1           **Simultaneous mRNA and protein quantification at the single-cell level**  
2           **delineates trajectories of CD4<sup>+</sup> T-cell differentiation**

3  
4   Dominik Trzuppek<sup>1</sup>, Melanie Dunstan<sup>1</sup>, Antony J. Cutler<sup>1</sup>, Mercedes Lee<sup>1</sup>, Leila Godfrey<sup>1</sup>,  
5   Dominik Aschenbrenner<sup>2</sup>, Holm H. Uhlig<sup>2</sup>, Linda S. Wicker<sup>1</sup>, John A. Todd<sup>1\*</sup> and Ricardo C.  
6   Ferreira<sup>1\*</sup>

7  
8   <sup>1</sup>JDRF/Wellcome Diabetes and Inflammation Laboratory, Wellcome Centre for Human  
9   Genetics, Nuffield Department of Medicine, NIHR Oxford Biomedical Research Centre,  
10   University of Oxford, Oxford, UK.

11   <sup>2</sup>Translational Gastroenterology Unit and Department of Paediatrics, John Radcliffe Hospital,  
12   University of Oxford, UK.

13  
14  
15   \*Co-senior authors:

16  
17   **Correspondence:**

18   Prof. John A. Todd:

19   Email: [john.todd@well.ox.ac.uk](mailto:john.todd@well.ox.ac.uk)

20  
21   Dr. Ricardo C. Ferreira:

22   Email: [ricardo.ferreira@well.ox.ac.uk](mailto:ricardo.ferreira@well.ox.ac.uk)

23  
24

25 **Abstract**

26 The transcriptomic and proteomic characterisation of CD4<sup>+</sup> T cells at the single-cell level has  
27 been performed traditionally by two largely exclusive types of technologies: single cell RNA-  
28 sequencing (scRNA-seq) technologies and antibody-based cytometry. Here we demonstrate that  
29 the simultaneous targeted quantification of mRNA and protein expression in single-cells  
30 provides a high-resolution map of human primary CD4<sup>+</sup> T cells, and reveals precise trajectories  
31 of canonical T-cell lineage differentiation in blood and tissue. We report modest correlation  
32 between mRNA and protein in primary CD4<sup>+</sup> T cells at the single-cell level, highlighting the  
33 importance of including quantitative protein expression data to characterise cell effector  
34 function. This approach provides a massively-parallel, cost-effective, solution to dissect the  
35 heterogeneity of immune cell populations and is ideally suited for the detailed  
36 immunophenotypic characterisation of rare and potentially pathogenic immune subsets. This  
37 transcriptomic and proteomic hybrid technology could have important clinical applications to re-  
38 define differentiation and activation of tissue-resident and blood human immune cells.

39

40 **Keywords:** single-cell RNA-sequencing (scRNA-seq); AbSeq; immunophenotyping; primary  
41 CD4<sup>+</sup> T cell; human.

42

## 43 **Introduction**

44 Our understanding of the human immune system has been greatly influenced by the  
45 technological advances leading to the ability to precisely quantify mRNA and/or protein  
46 expression at the single-cell level. In particular, the implementation of flow cytometry as a  
47 routine and widely-accessible research tool has shaped much of our current knowledge about the  
48 complexity of the immune system. With increased availability of fluorochrome-conjugated  
49 antibodies and more powerful lasers, flow-cytometric assays allow typically 15-20 parameters  
50 that can be assessed in parallel. Developments in single-cell mass cytometry (CyTOF) have  
51 similarly allowed the simultaneous assessment of the expression of up to 50 protein targets using  
52 heavy metal-labeled antibodies<sup>1</sup>.

53  
54 The advent of single-cell RNA-sequencing (scRNA-seq) has provided an unprecedented  
55 opportunity to investigate the global transcriptional profile at the single-cell level. In contrast to  
56 cytometry-based technologies, which are limited to the concurrent detection of up to a few tens  
57 of protein markers, scRNA-seq technologies allow to profile the entire transcriptome. With the  
58 concomitant reduction in sequencing costs, there has been a recent explosion in scRNA-seq  
59 platforms available to immunologists<sup>2,3</sup>. These fundamentally differ in the cell capture methods  
60 and resulting sensitivity, ranging from a few hundreds of cells profiled with high sensitivity,  
61 using plate-based capture methods such as SMART-seq<sup>2,4</sup>, tens of thousands of cells with lower  
62 sensitivity using whole-transcriptome scRNA-seq platforms, such as 10X Genomics<sup>5</sup>, Seq-Well<sup>6</sup>  
63 or Drop-seq<sup>7</sup>.

64  
65 Despite the growing popularity of whole-transcriptome scRNA-seq, two main issues still affect  
66 the performance of these platforms: cost and sensitivity. Even at high sequencing coverage,  
67 resulting in increased sequencing costs, stochastic dropout is a well-known issue of scRNA-seq,  
68 leading to an inflation of zero-expression measurements. Furthermore, although several methods  
69 have been developed to impute missing expression values, questions remain about the  
70 performance of these methods<sup>8</sup>. This technical limitation is particularly relevant for resting  
71 primary cells, such as CD4<sup>+</sup> T cells, and mainly limits the robust detection and quantification of

72 lowly expressed genes, including lineage-defining transcription factors, which are critical for  
73 cell-type identification and annotation.

74

75 In this study we describe an integrated workflow, using the BD Rhapsody targeted scRNA-seq  
76 system (commercialised by BD Biosciences), to simultaneously quantify the expression of 397  
77 genes at the mRNA level and up to 68 genes at the protein level with oligo-conjugated antibodies  
78 (AbSeq). We sought to assess the sensitivity of this multi-omics system to immunophenotype  
79 human primary CD4<sup>+</sup> T cells at the single-cell level, and to identify discrete cell-states providing  
80 potential new insight into the functional heterogeneity of T cells. By combining the expression of  
81 a targeted set of genes with the highly quantitative measurement of key protein markers, we  
82 generated a high-resolution map of human CD4<sup>+</sup> T cells in blood and tissue, and delineated  
83 distinct trajectories of T-cell differentiation associated with a gradient of activation, which were  
84 apparent even in resting primary cells. Our data also shows very clearly the frequent low  
85 correlation between mRNA and protein expression in primary CD4<sup>+</sup> T cells, thereby challenging  
86 the current dogma that our current understanding of the immune system can be re-defined based  
87 on single-cell transcriptional data alone.

88



## 89 Results

### 90 Simultaneous protein quantification increases the power of scRNA-seq to dissect the 91 functional heterogeneity of human CD4<sup>+</sup> T cells

92 In this study we wanted to investigate the power of a unified high-throughput experimental  
93 workflow combining targeted scRNA-seq and the quantification of protein expression at the  
94 single-cell level to dissect the heterogeneity of resting human primary CD4<sup>+</sup> T cells in blood. To  
95 address this question, we initially profiled the expression of 397 genes at the mRNA level,  
96 coupled with 37 protein targets (**Supplementary Table 1**) using the AbSeq technology<sup>9</sup> in CD4<sup>+</sup>  
97 T cells isolated from blood of a systemic lupus erythematosus (SLE) patient. To enrich for the  
98 relative distribution of two less abundant CD4<sup>+</sup> T-cell subsets: (i) CD127<sup>low</sup>CD25<sup>+</sup> T cells,  
99 containing the Treg population; and (ii) CD127<sup>low</sup>CD25<sup>low</sup> T cells, containing a subset of non-  
100 conventional CD25<sup>low</sup>FOXP3<sup>+</sup> Tregs previously characterised in autoimmune patients<sup>10</sup>, we  
101 devised a FACS-sorting strategy to isolate and profile equal numbers of cells from the three  
102 defined T-cell subsets (**Fig. 1a**). Following FACS sorting, cells from each subset were labeled  
103 with a barcoded oligo-tagged antibody (sample tag) prior to cell loading – a method related to the  
104 recently described cell-hashing technique<sup>11</sup> – to identify their original sorting gate and to assess  
105 the frequency of cell multiplets obtained in this experiment.

106

107 A total of 9,898 captured cells passed initial QC, of which a small proportion (1.9%;  
108 **Supplementary Table 2**) were assigned as multiplets and excluded from the analysis. Of note,  
109 we observed complete sequencing saturation of the mRNA library, assessed as the number of  
110 cDNA molecules with a novel Unique Molecular Identifier (UMI) identified with increasing  
111 sequencing coverage, for a coverage of <3,000 reads/cell (**Supplementary Fig. 1a**). In contrast,  
112 we obtained an 80% sequencing saturation at a coverage of >6,000 reads/cell for the AbSeq  
113 library (**Supplementary Fig. 1b**). This is illustrated in the large dynamic range of expression of  
114 the protein targets, reaching up to thousands of unique copies in cells displaying higher levels of  
115 expression (**Supplementary Fig. 1c**). Of note, the distribution of most proteins, including all  
116 those that are known not to be expressed on CD4<sup>+</sup> T cells was centered around zero copies  
117 (**Supplementary Fig. 1c**), which demonstrates the high specificity of the AbSeq  
118 immunostainings. To further test the sensitivity of the AbSeq protein measurements, we next

119 generated a two-dimensional plot depicting the AbSeq expression of IL-2RA (CD25) and IL-7R  
120 (CD127), which we found to recapitulate the flow cytometric profile obtained with the same two  
121 markers used for the FACS-sorting of the assessed T-cell subsets (**Fig. 1b**). Furthermore, by  
122 overlaying the sample-tag information, we were able to confirm that the expression profiles of  
123 CD127 and CD25 mimicked the sorting strategy precisely for all three subsets (**Fig. 1b**),  
124 therefore illustrating the highly quantitative nature of the protein measurements.

125

126 Next we performed unsupervised hierarchical clustering combining the mRNA and protein  
127 expression data and visualised the clusters in a two-dimensional space using Uniform Manifold  
128 Approximation and Projection (UMAP)<sup>12</sup>. One of the main drivers of functional differentiation  
129 in CD4<sup>+</sup> T cells is the acquisition of a memory phenotype in response to antigen stimulation,  
130 typically marked by the expression of CD45RA on naïve cells and CD45RO on memory cells.  
131 However, because these are splice forms of the same gene (*PTPRC*; CD45), its discrimination  
132 cannot be achieved using UMI-based scRNA-seq systems targeting the 3' or 5' ends of the  
133 transcript. By measuring the expression of the two isoforms at the protein level, we were able to  
134 identify a marked expression gradient associated with a gradual loss of CD45RA and  
135 concomitant gain of CD45RO along the first component of the UMAP plot, indicating that the  
136 acquisition of a memory phenotype is indeed the main source of biological variation driving the  
137 clustering of CD4<sup>+</sup> T cells (**Fig. 1c**). One notable exception was the re-expression of CD45RA in  
138 the most differentiated memory cells (**Fig. 1c**). This observation is consistent with the phenotype  
139 of differentiated effector memory CD4<sup>+</sup> T cells that re-express CD45RA (TEMRA)<sup>13</sup>, and  
140 illustrates the power of this highly multiparametric approach to identify subtle alterations in  
141 CD4<sup>+</sup> T-cell states, while mitigating the potential issue of cell-type misclassification based on a  
142 few prototypical markers such as CD45RA/RO.

143

#### 144 **Single-cell mRNA and protein immunophenotyping identifies distinct trajectories of CD4<sup>+</sup>** 145 **T cell differentiation in blood**

146 Integration of the multiparametric transcriptional and proteomics data generated provided  
147 distinct clustering of CD4<sup>+</sup> T cells into discrete clusters along the naïve/memory differentiation  
148 axis (**Fig. 2a**). We observed an increased number of clusters within the memory compartment,

149 marked by the differential expression of defined sets of signature genes (**Fig. 2b** and  
150 **Supplementary Fig. 2a**), which was consistent with the increased phenotypic diversity in  
151 differentiated CD4<sup>+</sup> T-cell subsets. Moreover, we observed that the expression of the canonical  
152 Th1 (*TBX21*, encoding TBET) and Th17 (*RORC*, encoding ROR $\gamma$ t) lineage-defining  
153 transcription factors was restricted to specific clusters within the memory effector T-cell (mTeff)  
154 population (**Fig. 2c**), indicating that these clusters are highly enriched for Th1 and Th17 Teffs.  
155 More importantly, similarly to the profile of CD45RA/RO expression, we observed a distinct  
156 gradient of expression of these transcription factors. Consistent with this gradient of functional  
157 differentiation, we observed a marked co-expression of canonical Th1 effector-type molecules  
158 with the expression of TBET (**Fig. 2d**), revealing a subset of highly activated Th1 T cells with a  
159 putative cytotoxic profile in the blood of this SLE patient. These data illustrate not only the  
160 sensitivity of the targeted scRNA-seq approach to sensitively quantify lowly expressed  
161 transcription factor genes, but also highlight the power of this integrated multi-omics approach to  
162 reveal trajectories of T-cell differentiation, which could be identified even in resting human  
163 primary CD4<sup>+</sup> T cells.

164  
165 In addition to resting CD4<sup>+</sup> T cells, we also profiled the same subsets of cells following short *in*  
166 *vitro* stimulation (90 min) with PMA+ionomycin, to assess cell-type specific cytokine  
167 production. Similarly to the resting condition, *in vitro* stimulated CD4<sup>+</sup> T cells formed discrete  
168 clusters along the naïve-memory differentiation axis (**Supplementary Fig. 3a,b**). Furthermore,  
169 we observed a consistent induction of expression of Th1 (IFN $\gamma$ ) and Th17 (IL-22) type cytokines  
170 that were restricted to the respective Th1 and Th17 clusters (**Supplementary Fig 3c,d**).  
171 Furthermore, although primers for the Th2 transcription factor GATA-3 were not included in this  
172 assay, therefore precluding the annotation of Th2 cells in resting CD4<sup>+</sup> T cells, we noted that *in*  
173 *vitro* stimulation revealed a distinct cluster of Th2 mTeffs cells marked by the expression of  
174 Th2-type cytokines, such as IL-13 (**Supplementary Fig 3e**), but also IL-4, IL-5 and IL-9  
175 (**Supplementary Fig. 2b**).

176  
177 **Targeted scRNA-seq and protein quantification reveals trajectories of human regulatory T**  
178 **cell activation in blood**

179 Recently, several scRNA-seq studies have refined our understanding of the heterogeneity of  
180 CD4<sup>+</sup> Tregs and their functional adaptation in tissues, in both mice and humans<sup>14,15</sup>. Given the  
181 sorting strategy used in this study, we were able to significantly enrich our CD4<sup>+</sup> T-cell dataset  
182 for the Treg population, which is highly enriched within the CD127<sup>low</sup>CD25<sup>hi</sup> population.  
183 Consistent with this enrichment strategy, we identified a large Treg population marked by the  
184 expression of the transcription factor FOXP3, but also other classical Treg signature genes,  
185 including HELIOS (encoded by *IKZF2*), IL-2RA, CTLA-4 or TIGIT (**Fig. 3a,b**). In agreement  
186 with their Treg-specific transcriptional programme, we found a marked suppression of IL-2  
187 transcription in Tregs following *in vitro* stimulation (**Supplementary Fig. 3f**). Notably, we  
188 found that the differentiation of Tregs from a naïve to memory phenotype was strongly  
189 associated with the expression of two transcription factors: BACH2 and BLIMP1 (encoded by  
190 *PRDM1*). These two key transcription factors displayed a very distinct mutually exclusive  
191 expression pattern, with high expression of *BACH2* in naïve cells, declining gradually – with  
192 concomitant gradual increase in *PRDM1* expression – along the naïve-memory differentiation  
193 axis (**Fig. 3c**). The gradual increase of *PRDM1* expression was found to be strongly associated  
194 with the expression of Treg activation markers such as *HLA-DRA*, *DUSP4* and *CD39* (**Fig. 3d**),  
195 and revealed a trajectory of Treg activation in resting primary CD4<sup>+</sup> T cells. These data suggest  
196 that the transcriptional interplay between BACH2 and BLIMP-1 is critical to regulate the  
197 differentiation of memory Treg subsets, which is in agreement with previous data in both mouse  
198 and humans<sup>14</sup>. The dynamic interplay of *BACH2* and *PRDM1* in the differentiation of Tregs was  
199 even more pronounced following *in vitro* stimulation (**Supplementary Fig. 4**), which further  
200 supports the hypothesis that they are primary regulators of the transcriptional programme  
201 associated with the differentiation of suppressive activated Tregs in humans in response to  
202 antigen stimulation.

203

### 204 **Multimodal immunophenotyping approach identifies rare populations of CD4<sup>+</sup> T cells in** 205 **circulation**

206 A feature of the most activated Treg cluster (cluster 3), was the marked differential expression of  
207 CD80 and CD86 at the protein level (**Fig. 3b,d**), two costimulatory molecules usually expressed  
208 in antigen presenting cells (APCs). Consistent with this restricted APC expression pattern, we

209 observed virtually no detectable expression of either *CD80* or *CD86* at the mRNA level in either  
210 resting or stimulated  $CD4^+$  T cell (**Supplementary Fig. 5a,b**). Recently, a mechanism of  
211 transendocytosis of *CD80/86* mediated by CTLA-4 has been described in mouse Tregs<sup>16</sup>.  
212 Therefore, one hypothesis is that the detected expression of these co-stimulatory molecules could  
213 be due to exogenous *CD80/86* molecules captured by CTLA-4 expressed on activated Tregs  
214 from the surface of APCs. In support of this hypothesis, we observe that the expression of  
215 *CD80/CD86* is specifically detected in the most activated Treg subset, which is also marked by  
216 high expression of CTLA-4 and HLA-class II molecules (**Fig. 3d**). To validate this observation,  
217 we next assessed the co-expression of CTLA-4 and *CD80/86* by flow cytometry in  $CD4^+$  T cells  
218 isolated from blood of two healthy donors. Although the expression of CTLA-4 on the surface of  
219  $CD4^+$  T cells is very low, intracellular staining revealed much higher expression on all Treg  
220 subsets (**Supplementary Fig. 5c,d**). In addition, we found that expression of *CD86* and, to a  
221 lesser extent, *CD80* were restricted to the memory Treg subset, and specifically to cells  
222 expressing the higher levels of CTLA-4 (**Supplementary Fig. 5e,f**). This striking co-expression  
223 of *CD86* and CTLA-4 was particularly evident within a subset of  $FOXP3^+HELIOS^-$  memory  
224 Tregs that expressed the higher levels of CTLA-4, and supports the hypothesis that these co-  
225 stimulatory molecules can be transiently detected on the surface of activated  $CD4^+$  T cells.  
226 Furthermore, we also observe a strong co-expression of *CD86* and HLA-DR, another marker  
227 associated with Treg activation (**Supplementary Fig. 5g**). We, however, cannot rule out that the  
228 possibility that *CD80/CD86* is specifically expressed in activated  $CD4^+$  T cells, but that the  
229 mRNA has a very short half-life, a hypothesis that has been previously reported<sup>17</sup>. We do note  
230 that the residual expression of *CD80* and *CD86* in both resting and *in vitro* stimulated  $CD4^+$  T  
231 cells is mostly restricted to the activated Treg and memory Teff clusters (**Supplementary Fig.**  
232 **5a,b**), and therefore, it is plausible that the expression of these co-stimulatory molecules in  $CD4^+$   
233 T cells is temporally restricted, while the protein expression is much more stable. Furthermore,  
234 we also note that expression of *CD80* was strongly upregulated in Th17 Teffs (cluster 7; **Fig.**  
235 **2b**), which may provide a mechanistic rationale for the recently reported suppression of Th17  
236 differentiation in response to anti-*CD80* treatment in mice<sup>18</sup>. Therefore, our data demonstrate the  
237 high sensitivity and specificity of the protein quantification using AbSeq, even using large  
238 numbers of antibodies simultaneously, and indicate that the surface expression of *CD80* and

239 CD86 can be used to identify activated Tregs and Th17 cells in circulation, and further  
240 investigate the putative function of CD80/86 in CD4<sup>+</sup> T cells.

241  
242 In addition, we were also able to identify a rare population of FOXP3<sup>+</sup> T cells marked by the  
243 specific expression of the small intestine-homing chemokine receptor CCR9 (cluster 10; **Fig. 3e**).  
244 This cluster was also marked by increased expression of other classical markers of tissue  
245 residency and migration to the gut, such as *ITGA4* (CD49d) and *ITGAE* (CD103; **Fig. 3e**). One  
246 distinguishing feature of this subset was the expression of the transcription factor *POU2AF1*  
247 (**Fig. 3e**). Interestingly, although *POU2AF1* (encoding OCA-B), has been mainly characterised  
248 as a B-cell specific transcription factor in blood, where it plays a role in B-cell maturation<sup>19</sup>, it  
249 has also been recently shown in mice to regulate the maintenance of memory phenotype and  
250 function in previously activated CD4<sup>+</sup> T cells<sup>20</sup>, and the differentiation of T follicular helper  
251 (Tfh) cells in the tissue<sup>21</sup>. These data suggest that this subset of CCR9<sup>+</sup> T cells may represent a  
252 previously uncharacterised population of recirculating tissue-resident Tregs in humans, and  
253 provides an illustrative example of the power of this multiparametric immunophenotyping  
254 approach to identify rare populations of CD4<sup>+</sup> T cells.

255  
256 **Data from independent experiments can be robustly integrated**

257 Given that the main advantage of this combined targeted scRNA-seq and proteomic approach is  
258 the ability to immunophenotype large numbers of cells from multiple donors, we next  
259 investigated whether we were able to integrate data generated from independent experiments.  
260 We replicated the initial experiment using the same pre-sorting strategy to isolate the three  
261 assessed CD4<sup>+</sup> T-cell subsets from an individual with type 1 diabetes and one healthy donor. To  
262 further test the limits of the protein quantification, we extended the AbSeq panel to 43 protein  
263 targets expressed on CD4<sup>+</sup> T cells (**Supplementary Table 1**). In agreement with the initial  
264 experiment, unsupervised clustering of the 23,947 cells passing QC revealed a similar  
265 discrimination of CD4<sup>+</sup> T-cell subsets (**Fig. 4a**). More importantly, we found very good  
266 alignment of the data from the three donors, with minimal evidence of significant experimental  
267 batch effects (**Fig. 4b**).



268

269 Furthermore, analysis of the donor-specific distribution of the identified CD4<sup>+</sup> T-cell clusters  
270 showed that the frequency of the putative CD4<sup>+</sup> cytotoxic Th1 subset (cluster 11), marked by the  
271 co-expression of TBET and effector-type cytokines, was highly increased in the SLE patient  
272 (**Fig. 4c-e**). To avoid age-specific differences in the relative distribution of the CD45RA<sup>+</sup> naïve  
273 and CD45RO<sup>+</sup> memory compartments in these donors, we normalised the analysis to the  
274 memory T-cell clusters only, which we were able to robustly annotate using the AbSeq data for  
275 the expression of CD45RA and CD45RO. Although we detected a few cells with this activated  
276 Th1 phenotype in circulation from every donor, there was a very substantial expansion in the  
277 SLE patient (2.3% of memory CD4<sup>+</sup> T cells compared to 0.3% and 0.1% in the T1D patient and  
278 healthy donor, respectively; **Fig. 4d**), suggesting that it could represent a pathogenic CD4<sup>+</sup> T-cell  
279 subset associated with systemic autoimmunity in this patient.

280

### 281 **Single-cell comparison of mRNA and protein expression levels reveals modest and variable** 282 **levels of correlation in primary CD4<sup>+</sup> T cells**

283 The parallel quantification of mRNA and protein expression for a large number of genes  
284 expressed in CD4<sup>+</sup> T cells in this experiment provided a unique opportunity to investigate their  
285 systematic correlation at the single-cell level. From the 43 proteins quantified with AbSeq, 26  
286 were also assessed at the transcriptional level and detected in our CD4<sup>+</sup> T-cell dataset. Generally,  
287 we observed modest (median Pearson correlation coefficient = 0.183) but variable levels of  
288 correlation in total resting CD4<sup>+</sup> T cells, ranging from 0.039 for *TNFRSF9* to 0.808 in *KLRB1*  
289 (encoding CD161; **Fig. 5a**). These findings were consistent with previous observations<sup>22,23</sup>, and  
290 suggest that primary CD4<sup>+</sup> T cells are highly specialised cells, where transcription is subject to  
291 tight regulation to avoid excessive energy consumption by the cell and to control effector  
292 function. As expected, by normalizing our analysis to a functionally more homogeneous  
293 population of memory CD4<sup>+</sup> T cells, we observed higher levels of correlation, which is  
294 consistent with their increased expression of the majority of the assessed T-cell markers. A  
295 slightly decreased correlation (median = 13.9%) was observed in *in vitro* stimulated CD4<sup>+</sup> T  
296 cells, suggesting an increased variance of protein and mRNA expression in activated CD4<sup>+</sup> T  
297 cells (**Fig. 5b**).

298

299 **Parallel mRNA and protein profiling provides increased cell-type resolution of the**  
300 **heterogeneous CD45<sup>+</sup> immune cell population in blood and tissue**

301 To investigate how this combined targeted scRNA-seq and transcriptomics approach performs  
302 on a more heterogeneous population of immune cells, we isolated total CD45<sup>+</sup> cells isolated from  
303 blood and a matching duodenal biopsy from two pediatric coeliac disease (CD) patients with  
304 active disease. In this experiment we captured a total of 31,907 single-cells that passed QC and  
305 expanded the AbSeq panel to the detection of 68 protein targets (**Supplementary Table 1**). As  
306 expected, we observed a very defined clustering of the different cell populations representing the  
307 CD45<sup>+</sup> immune cells (**Fig. 6a**). Consistent with previous data<sup>24,25</sup>, we found a clear separation in  
308 cells isolated from either blood or the small intestine (**Fig. 6b**), indicating a strong transcriptional  
309 signature of tissue-residency. Furthermore, clustering of the cells isolated from either blood (**Fig.**  
310 **6c**) and tissue (**Fig. 6d**) separately, revealed clear identification of the expected cell populations  
311 in both tissues, which could be easily manually annotated based on the differential expression of  
312 canonical cell-type specific gene signatures. The main distinction was the relative distribution of  
313 the main immune populations, with a marked increased representation of B-cell, NK-cell and  
314 undifferentiated CD14<sup>+</sup>CD16<sup>-</sup> monocyte populations in blood, and a significant increase in the  
315 frequency of plasma cells in the small intestine. We were similarly able to similarly identify  
316 distinct trajectories of cell differentiation in other immune cell subsets, as illustrated by the  
317 gradient of differentiation and class-switching of B cells in blood (**Supplementary Fig. 6a-c**). B  
318 cells in circulation were clearly dominated by a naïve IgD<sup>+</sup>IgM<sup>+</sup> CD27<sup>-</sup> subset, and only a small  
319 fraction of class-switched IgG<sup>+</sup> CD27<sup>+</sup> memory B cells, which was consistent with the young age  
320 of the CD patients. In contrast, in the small intestine, we observed only a small population of B  
321 cells, which were mostly represented by the class switched IgG<sup>+</sup> CD27<sup>+</sup> memory phenotype. In  
322 addition, we identified a vastly expanded population of antibody-secreting plasma cells  
323 (**Supplementary Fig 6d,e**). Of note, because we were able to specifically assess the expression  
324 of the secreted Ig isotypes, we could also discriminate precisely the different functional plasma  
325 cell subsets, including a very abundant population IgA-secreting plasma cells (**Supplementary**  
326 **Fig. 6f**), which are known play a critical role in interaction with the microbiome in the gut.

327



328 In agreement with our findings in CD4<sup>+</sup> T cells, we found that the acquisition of a memory  
329 phenotype was the main driver of the clustering of both CD4<sup>+</sup> and CD8<sup>+</sup> T cells (**Supplementary**  
330 **Fig. 7a,b**). In addition, we were also able to identify other clusters of non-conventional T cells,  
331 including a subset of  $\gamma\delta$  T cells and mucosal-associated invariant T cells (MAIT) in blood, which  
332 shared similarities with the transcriptional signature of memory CD8<sup>+</sup> T cells, marked by the  
333 expression of high levels of effector-type cytokines genes, such as *NKG7* (**Supplementary Fig.**  
334 **7b**). In contrast, CD4<sup>+</sup> T cells isolated from the small intestine, consistent with their tissue-  
335 resident function, were restricted to a memory phenotype and displayed a higher level of  
336 functional heterogeneity (**Fig. 6e**). Notably, we identified a very enlarged population of FOXP3<sup>+</sup>  
337 Tregs in the tissue compared to the matching circulating subset (**Fig. 6f**). Moreover, the  
338 simultaneous assessment of the protein expression of CXCR5, ICOS and PD-1, identified a  
339 cluster of Tfh cells, which could be distinctly clustered along a trajectory of Tfh-cell activation,  
340 as illustrated by the gradient of expression of key Tfh functional transcripts, such as *IL21*,  
341 *CXCL13* and *BTLA* (**Fig. 6g,h**). Together, these data provide an example of the power of this  
342 multimodal approach to identify trajectories of cell differentiation and cell states in diverse  
343 immune cell and tissue types.

344

## 345 **Discussion**

346

347 The advent of scRNA-seq has proved to be a transformative technology that is shaping our  
348 understanding of the complexity and function of the human immune system<sup>26,27</sup>. However,  
349 currently, both the elevated costs to perform these experiments, as well as the reliance on  
350 transcriptional data alone, pose significant challenges to the widespread practical applicability of  
351 these technologies. In this study, we present an integrated, cost-effective, approach to sensitively  
352 assess simultaneous expression of mRNA and protein for hundreds of key immune targets at the  
353 single-cell level using the AbSeq technology<sup>9</sup>.

354

355 Recently, two similar approaches, CITE-seq<sup>22</sup> and REAP-seq<sup>23</sup>, have been described to measure  
356 protein expression using oligo-tagged antibodies in parallel with scRNA-seq data. Furthermore,  
357 other applications are currently being developed to integrate the growing portfolio of single-cell  
358 omics technologies<sup>28</sup>. A fundamental difference with the approach described in this study is that  
359 these technologies all rely on whole-transcriptome data, providing a high-level cross-sectional  
360 representation of all polyA transcripts in the cell. In contrast, by using targeted scRNA-seq, we  
361 are relying on prior knowledge to specifically assess the expression of hundreds of selected  
362 genes in single cells. A limitation of this approach is that it is, by definition, restricted to the set  
363 of pre-selected genes, and therefore is not suited for a purely discovery-based exploratory  
364 experiment, where the identification of novel biological determinants of cellular identity is the  
365 central question – particularly in poorly characterised non-immune cell types. However, as the  
366 transcriptome of immune cell subsets becomes better characterised, it may become feasible to  
367 target the expression of the most variable genes, which could yield novel insight into previously  
368 uncharacterised biology and regulation. Moreover, a targeted approach provides a more sensitive  
369 quantification of expression of the selected genes at a fraction of the cost to generate the  
370 sequencing libraries, as it avoids the detection of highly expressed invariant housekeeping genes,  
371 which take up the vast majority of the whole-transcriptome scRNA-seq libraries. The increased  
372 sensitivity of a targeted approach is particularly relevant for the accurate assessment of lowly-  
373 expressed genes with critical regulatory function, such as transcription factors, which can be  
374 poorly quantified using traditional whole-transcriptome scRNA-seq data. It therefore, provides a  
375 knowledge-based approach to validate and extend whole-transcriptome scRNA-seq findings, that

376 can be widely implemented in any research or clinical setting. Similarly to other widely-  
377 implemented knowledge-based single-cell immunophenotyping tools such as flow-cytometry and  
378 CyTOF, the highly customisable nature of this approach is critical to investigate specific research  
379 questions with very high sensitivity and in larger number of samples. However, in contrast to  
380 CyTOF which is inherently time-consuming and requires the availability of very large numbers  
381 of cells to maximise the information generated by each run, this technology is ideally suited for  
382 unique and highly valuable clinical samples, for which cell availability and number are major  
383 practical constraints.

384  
385 An important finding from this study and other related studies<sup>22,23</sup>, is the generally low levels of  
386 correlation between mRNA and protein expression in primary CD4<sup>+</sup> T cells at the single-cell  
387 level. One possible explanation for this observation is that reduced sensitivity of scRNA-seq to  
388 quantify mRNA expression, may be leading to an underestimation of the correlation coefficients.  
389 However, we note that there are notable exceptions, such as CD161, which displayed a high  
390 correlation between mRNA and protein levels at 0.847 in memory CD4<sup>+</sup> T cells, demonstrating  
391 that a systematic error in the quantification of mRNA levels by scRNA-seq technologies is not  
392 the only factor contributing to the observed low level of correlation. These findings therefore  
393 underscore the importance of parallel protein quantification to better identify stable cellular  
394 phenotypes associated with cell function. In contrast to mRNA expression, proteins display a  
395 much larger dynamic range of expression and longer half-life<sup>29,30</sup>, resulting in much higher copy  
396 numbers, and a more accurate and reliable quantification compared to their mRNA counterparts.  
397 This is particularly relevant in differentiated resting primary cells, such as CD4<sup>+</sup> T cells, where  
398 transcription is tightly regulated to maintain effector function. These low copy numbers result in  
399 increased stochastic variation in mRNA quantification and dropout rate, which impair the  
400 accuracy single-cell methods that rely only on transcriptional data. Furthermore, mRNA  
401 profiling provides only a snapshot into the current functional state of the cell, which can be better  
402 assessed with combined protein expression data. An illustration of the power of this combined  
403 multimodal approach is the detailed trajectories of differentiation that we identified in resting  
404 primary CD4<sup>+</sup> T cells, which were recapitulated by precise gradients of mRNA expression. The  
405 sensitivity of these measurements combined with the high numbers of cells analysed lend  
406 themselves to identify gradual and subtle changes in cell states, which are critical to identify

407 dynamic changes reflecting mechanisms of functional adaptation in a heterogeneous cell  
408 population.

409

410 The digital nature and lack of spectral overlap issues with the AbSeq measurements provide a  
411 superior specificity and sensitivity compared to flow cytometry for the quantification of lowly-  
412 expressed proteins, allowing accurate detection of zero or very low copy numbers, which are  
413 usually difficult to discriminate by flow cytometry. A good example was the sensitive  
414 quantification of the co-stimulatory protein CD80 by AbSeq, whose expression was found to be  
415 restricted to a cluster of activated Tregs and Th17 Teff cells. In comparison, flow cytometric  
416 assessment of CD80 expression was much less well-resolved with higher background, resulting  
417 in lower dynamic range of expression comparing to AbSeq. Currently, we have assessed the  
418 expression of up to 68 protein targets in parallel, with minimal evidence of sensitivity or  
419 specificity issues. There is no theoretical limit to the number of proteins that can be assessed in  
420 parallel, although the expression levels of the assessed target proteins may be the only major  
421 technical limitation. To date, protein quantification is restricted to surface-expressed targets,  
422 although as this technology develops, assessment of intracellular targets will further improve the  
423 scope of this approach. Furthermore, parallel detection of TCR and BCR sequences in this  
424 system is currently being developed<sup>31</sup>, which will provide critical insight into the clonality of the  
425 assessed T- and B-cell subsets. This is particularly relevant in the field of autoimmune diseases  
426 as a new tool to identify the elusive pathogenic autoreactive cell clones.

427

428 In summary we here show that combined targeted scRNA-seq and protein expression analysis  
429 provides a high-resolution map of human primary CD4<sup>+</sup> T cells in blood and tissue, and reveals  
430 precise trajectories of functional differentiation. Our data provide a proof-of-principle for the  
431 implementation of this integrated approach as a widely applicable, and cost-efficient research  
432 tool for immunologists that could be particularly valuable in a clinical setting for the  
433 characterisation of rare patient samples with limited cell numbers, as well as to assess the  
434 functional consequence at the single-cell level of targeting key biological pathways *in vivo*, in  
435 patients treated with immunotherapeutic drugs.

## 436 **Methods**

437

### 438 **Subjects**

439 Study participants included one SLE patient (37 y/o female), recruited from the Cambridge  
440 BioResource, and one T1D patient (16 y/o male) and one autoantibody negative healthy donor  
441 (14 y/o male) recruited from the JDRF Diabetes–Genes, Autoimmunity and Prevention (D-GAP)  
442 study.

443

444 Comparison of total CD45<sup>+</sup> immune cells isolated from paired blood and a duodenal biopsy was  
445 performed in cells isolated from two paediatric coeliac disease (CD) patients with active disease  
446 (one 5 y/o male with Marsh scale disease score of 3c, and one 15 y/o male with Marsh scale  
447 disease score of 3b).

448

449 Flow cytometric assessment of the expression of CTLA-4, CD80 and CD86 in the Treg subsets  
450 was performed in two adult healthy donors (53 y/o female and 33 y/o male), recruited from the  
451 Oxford Biobank.

452

453 All samples and information were collected with written and signed informed consent. The study  
454 was approved by the local Peterborough and Fenland research ethics committee (05/Q0106/20).  
455 The D-GAP study was approved by the Royal Free Hospital & Medical School research ethics  
456 committee; REC (08/H0720/25). Small bowel biopsies were collected as part of a routine  
457 gastroduodenoscopy. Consent for research was obtained via the Oxford GI illnesses biobank  
458 (REC 16/YH/0247).

459

### 460 **Cell preparation and FACS sorting**

461 T-cell centric assays were performed on cryopreserved peripheral blood mononuclear cells  
462 (PBMCs). Cryopreserved PBMCs were thawed at 37°C and resuspended drop-by-drop in X-  
463 VIVO (Lonza) with 1% heat-inactivated, filtered human AB serum (Sigma). Total CD4<sup>+</sup> T cells  
464 were isolated by negative selection using magnetic beads (StemCell Technologies), and  
465 incubated with Fixable Viability Dye eFluor 780 (eBioscience) for 15 min at room temperature.  
466 After washing in PBS with 0.02% BSA cells were stained in 5ml FACS tubes (Falcon) with the  
467 fluorochrome-conjugated antibodies used for cell sorting and the BD AbSeq oligo-conjugated

468 antibodies (BD Bioscience), according to the manufacturer's instructions.

469

470 Cell sorting was performed using a BD FACSAria Fusion sorter (BD Biosciences) at 4°C into  
471 1.5 mL DNA low bind Eppendorf tubes containing 500ul of X-Vivo with 1% heat-inactivated,  
472 filtered human AB serum. Following cell sorting, the three assessed T-cell subsets were  
473 incubated with sample tag antibodies (Sample multiplexing kit; BD Bioscience), washed 3 times  
474 in cold BD sample buffer (BD Biosciences) and counted. Samples were then pooled together in  
475 equal ratios in 620 ul of cold BD sample buffer at the desired cell concentrations – ranging from  
476 20 to 40 cells/ul for an estimated capture rate of 10,000-20,000 single-cells – and immediately  
477 loaded on a BD Rhapsody cartridge (BD Biosciences) for single-cell capture.

478

479 For the *in vitro* stimulated condition, sorted CD4<sup>+</sup> T-cell subsets were incubated in round-bottom  
480 96-well plates (20,000 cells/well) at 37°C for 90 min in X-Vivo with 5% heat-inactivated,  
481 filtered human AB serum with a PMA and ionomycin cell stimulation cocktail (eBioscience), in  
482 the absence of protein transport inhibitors. Cells were harvested into FACS tubes, washed with  
483 cold BD sample buffer and further incubated with the BD AbSeq oligo-conjugated antibodies,  
484 according to the manufacturer's instructions. All FACS/sorting and AbSeq antibodies used in  
485 this study are listed in **Supplementary Table 1**.

486

#### 487 **Tissue dissociation and isolation of CD45<sup>+</sup> immune cells**

488 For the characterisation of CD45<sup>+</sup> immune cells from tissue and tissue, blood-derived PBMCs  
489 and paired duodenal biopsies were cryopreserved in CryoStor CS10 reagent (StemCell) and  
490 stored in liquid nitrogen until sample processing. Blood-derived PBMCs were processed as  
491 described above. The paired duodenal biopsies were thawed at 37°C in X-Vivo with 1% heat-  
492 inactivated, filtered human AB serum then subjected to gentle mechanical dissociation using  
493 gentleMACS (Miltenyi Biotec) followed by short 20 min enzymatic dissociation at 37°C using a  
494 very low concentration of Liberase TL (0.042 mg/ml; Sigma), 10 nM HEPES and 1mg/ml  
495 DNase I in X-Vivo with 10% FBS. Following enzymatic dissociation, the biopsies were  
496 homogenised using a more vigorous gentleMACS cycle and strained through a 70um filter with

497 physical maceration to generate single-cell suspensions. CD45<sup>+</sup> immune cells were further  
498 enriched using a 70/35% Percoll gradient (Sigma). The dissociation protocol and low  
499 concentration of Liberase TL enzyme were optimised to show minimal effect on the degradation  
500 of surface protein expression levels, as assessed by flow cytometry. This was critical to ensure  
501 maximal sensitivity and specificity of the AbSeq protein quantification in these samples.

502  
503 Blood- and tissue-derived single-cell suspensions were incubated with Fixable Viability Dye  
504 eFluor 780 for 15 min at room temperature and total CD45<sup>+</sup> cells were isolated by FACS sorting.  
505 Following FACS sorting the individual blood and tissue-derived subsets were incubated with Fc  
506 block reagent (BD Biosciences) and Sample Tag antibodies for 20 min at room temperature.  
507 Following three rounds of washing, cells were counted and equal numbers (35,000 cells) of  
508 blood- and tissue-derived cells from the same donor were pooled together and incubated with  
509 AbSeq antibody mastermix (**Supplementary Table 1**) according to the manufacturer's  
510 instructions. Cells were then washed two times in cold sample buffer, counted and resuspended  
511 in 620 ul of cold sample Buffer at a final concentration of 40 cells/ul for loading on a BD  
512 Rhapsody cartridge.

513

#### 514 **cDNA library preparation and sequencing**

515 Single-cell capture and cDNA library preparation was performed using the BD Rhapsody  
516 Express Single-cell analysis system (BD Biosciences), according to the manufacturer's  
517 instructions. Briefly, cDNA was amplified - 10 cycles for resting cells and 9 cycles for *in vitro*  
518 activated cells - using the Human Immune Response primer panel (BD Biosciences), containing  
519 399 primer pairs, targeting 397 different genes. The resulting PCR1 products were purified using  
520 AMPure XP magnetic beads (Beckman Coulter) and the respective mRNA and AbSeq/Sample  
521 tag products were separated based on size-selection, using different bead ratios (0.7X and 1.2X,  
522 respectively). The purified mRNA and Sample tag PCR1 products were further amplified (10  
523 cycles), and the resulting PCR2 products purified by size selection (1X and 1.2X for the mRNA  
524 and Sample tag libraries, respectively). The concentration, size and integrity of the resulting PCR  
525 products was assessed using both Qubit (High Sensitivity dsDNA kit; Thermo Fisher) and the  
526 Agilent 4200 TapeStation system (High Sensitivity D1000 screentape; Agilent). The final



527 products were normalised to 2.5 ng/ul (mRNA), 0.5 ng/ul (Sample tag) and 0.275 ng/ul (AbSeq)  
528 and underwent a final round of amplification (6 cycles for mRNA and 8 cycles for Sample Tag  
529 and AbSeq) using indexes for Illumina sequencing to prepare the final libraries. Final libraries  
530 were quantified using Qubit and Agilent Tapestation and pooled (~38/58/2%  
531 mRNA/AbSeq/Sample tag ratio) to achieve a final concentration of 5nM. Final pooled libraries  
532 were spiked with 10% PhiX control DNA to increase sequence complexity and sequenced (75bp  
533 paired-end) on HiSeq 4000 sequencer (Illumina).

534

### 535 **CD80/86 immunophenotyping**

536 Immunophenotyping of the co-stimulatory molecules CD80/CD86 and CTLA-4 was performed  
537 in both freshly isolated and cryopreserved PBMCs. Cells were initially stained with  
538 fluorochrome-conjugated antibodies against surface receptors (see **Supplementary Table 1**) in  
539 BD Brilliant stain buffer (BD Biosciences) for 30 min at room temperature. Fixation and  
540 permeabilisation was performed using FOXP3 Fix/Perm Buffer Set (eBioscience) according to  
541 the manufacturer's instructions, and cells were then immunostained with fluorochrome-  
542 conjugated antibodies against intracellular markers (including CTLA-4, CD80 and CD86 where  
543 indicated) in BD Brilliant stain buffer for 45 min at room temperature. Immunostained samples  
544 were acquired using a BD Fortessa (BD Biosciences) flow cytometer with FACSDiva software  
545 (BD Biosciences) and analysed using FlowJo (Tree Star, Inc.).

546

### 547 **Data analysis and QC**

548 The FASTQ files obtained from sequencing were analysed following the BD Biosciences  
549 Rhapsody pipeline (BD Biosciences). Initially, read pairs with low quality are removed based on  
550 read length, mean base quality score and highest single nucleotide frequency. The remaining  
551 high-quality R1 reads are analysed to identify cell label and unique molecular identifier (UMI)  
552 sequences. The remaining high-quality R2 reads are aligned to the reference panel sequences  
553 (mRNA and AbSeq) using Bowtie2. Reads with the same cell label, same UMI sequence and  
554 same gene are collapsed into a single molecule. The obtained counts are adjusted by BD  
555 Biosciences developed error correction algorithms – recursive substitution error correction  
556 (RSEC) and distribution-based error correction (DBEC) – to correct sequencing and PCR errors.  
557 Cell counts are then estimated, using second derivative analysis to filter out noise cell labels,



558 based on the assumption that putative cells have much more reads than noise cell labels. Thus  
559 when cells are sorted in the descending order by number of reads, the inflection point can be  
560 observed on a log transformed cumulative curve of number of reads. For the CD45<sup>+</sup> sorted cells,  
561 due to the heterogeneity of the sample, we observed two inflection points (and two  
562 corresponding second derivative minima), and therefore, only cell labels after the second  
563 inflection point were considered noise labels. Barcoded oligo-conjugated antibodies (single-cell  
564 multiplexing kit; BD Biosciences) were used to infer origin of sample (ie. sorted cell population)  
565 and multiplet rate by the BD Rhapsody analysis pipeline.

566

567 The DBEC-adjusted molecule counts obtained from the Rhapsody pipeline were imported and  
568 the expression matrices were further analysed using R package Seurat 3.0<sup>32</sup>. Most cells identified  
569 as undetermined by the Rhapsody pipeline had low number of features (mRNA and protein  
570 reads). These cells along with other cells with similarly low (<35) number of features were  
571 filtered out. Identified multiplet cells were also filtered out at this stage. A detailed summary of  
572 the number of putative captured cells, estimated multiplet rate and number of cells filtered from  
573 the analysis in each of the three experiments performed in this study is provided in  
574 **Supplementary Table 2**. The resulting matrices were log normalised using the default  
575 parameters in Seurat and the UMI counts were regressed out when scaling data. Uniform  
576 Manifold Approximation and Projection (UMAP) was used for dimensionality reduction. The  
577 default number of used dimensions of PCA reduction was increased to 30 based on Seurat elbow  
578 plot. For clustering, we increased the default resolution parameter value for clustering to 1.2 to  
579 obtain more fine-grained set of clusters. Differential expression analysis was performed using  
580 negative binomial generalized linear model implemented in Seurat, and integration of data from  
581 multiple experiments was performed using a combination of canonical correlation analysis  
582 (CCA) and identification of mutual nearest neighbours (MNN), implemented in Seurat 3.0<sup>33</sup>.

583

584 **Acknowledgements**

585 We thank donors and patients for participation in this study. We gratefully acknowledge the  
586 participation of all NIHR Cambridge BioResource volunteers, and thank the NIHR Cambridge  
587 BioResource centre and staff for their contribution. We thank C. Guy from the Department of  
588 Paediatrics, University of Cambridge for D-GAP sample recruitment. We thank the volunteers  
589 from the Oxford Biobank ([www.oxfordbiobank.org.uk](http://www.oxfordbiobank.org.uk)) for their participation in this recall study.  
590 The Oxford BioBank and Oxford Bioresource are funded by the NIHR Oxford Biomedical  
591 Research Centre (BRC). We acknowledge the contribution of the Oxford Gastrointestinal  
592 biobank, which is supported by the NIHR Oxford Biomedical Research Centre. We also thank  
593 Georgina Burdon, Shannah Donhou, Sarune Kacinskaite and Heather McMurray, University of  
594 Oxford for sample collection and preparation and members of the Diabetes and Inflammation  
595 Laboratory for critical discussion.

596

597 **Funding**

598 This work was supported by the JDRF UK Centre for Diabetes - Genes, Autoimmunity and  
599 Prevention (D-GAP; 4-2007-1003) in collaboration with M. Peakman and T. Tree at Kings  
600 College London, a strategic award to the Diabetes and Inflammation Laboratory from the JDRF  
601 (4-SRA-2017-473-A-A) and the Wellcome (107212/A/15/Z), and a grant from the JDRF (1-  
602 SRA-2019-657-A-N).

603

604 **Conflict of interest**

605 The authors report no conflict of interest.

606

## 607 References

- 608 1. Ornatsky, O. *et al.* Highly multiparametric analysis by mass cytometry. *J. Immunol. Methods* **361**, 1–20 (2010).
- 609 2. See, P., Lum, J., Chen, J. & Ginhoux, F. A Single-Cell Sequencing Guide for  
610 Immunologists. *Frontiers in Immunology* **9**, 2425 (2018).
- 611 3. Papalexis, E. & Satija, R. Single-cell RNA sequencing to explore immune cell  
612 heterogeneity. *Nat. Rev. Immunol.* **18**, 35 (2017).
- 613 4. Picelli, S. *et al.* Smart-seq2 for sensitive full-length transcriptome profiling in single cells.  
614 *Nat. Methods* **10**, 1096 (2013).
- 615 5. Zheng, G. X. Y. *et al.* Massively parallel digital transcriptional profiling of single cells.  
616 *Nat. Commun.* **8**, 14049 (2017).
- 617 6. Gierahn, T. M. *et al.* Seq-Well: portable, low-cost RNA sequencing of single cells at high  
618 throughput. *Nat. Methods* **14**, 395 (2017).
- 619 7. Macosko, E. Z. *et al.* Highly Parallel Genome-wide Expression Profiling of Individual  
620 Cells Using Nanoliter Droplets. *Cell* **161**, 1202–1214 (2015).
- 621 8. Andrews, T. S. & Hemberg, M. False signals induced by single-cell imputation.  
622 *F1000Research* **7**, (2018).
- 623 9. Shahi, P., Kim, S. C., Haliburton, J. R., Gartner, Z. J. & Abate, A. R. Abseq: Ultrahigh-  
624 throughput single cell protein profiling with droplet microfluidic barcoding. *Sci. Rep.* **7**,  
625 44447 (2017).
- 626 10. Ferreira, R. C. *et al.* Cells with Treg-specific FOXP3 demethylation but low CD25 are  
627 prevalent in autoimmunity. *J. Autoimmun.* **84**, 75–86 (2017).
- 628 11. Stoeckius, M. *et al.* Cell Hashing with barcoded antibodies enables multiplexing and  
629 doublet detection for single cell genomics. *Genome Biol.* **19**, 224 (2018).
- 630 12. McInnes, L., Healy, J. & Melville, J. UMAP: Uniform Manifold Approximation and  
631 Projection for Dimension Reduction. *arXiv arXiv:1802*, (2018).
- 632 13. Sallusto, F., Lenig, D., Förster, R., Lipp, M. & Lanzavecchia, A. Two subsets of memory  
633 T lymphocytes with distinct homing potentials and effector functions. *Nature* **401**, 708–  
634 712 (1999).
- 635 14. Zemmour, D. *et al.* Single-cell gene expression reveals a landscape of regulatory T cell  
636 phenotypes shaped by the TCR. *Nat. Immunol.* **19**, 291–301 (2018).
- 637 15. Miragaia, R. J. *et al.* Single-Cell Transcriptomics of Regulatory T Cells Reveals  
638 Trajectories of Tissue Adaptation. *Immunity* **50**, 493-504.e7 (2019).
- 639 16. Ovcinnikovs, V. *et al.* CTLA-4-mediated transendocytosis of costimulatory molecules  
640 primarily targets migratory dendritic cells. *Sci. Immunol.* **4**, eaaw0902 (2019).
- 641 17. Höllsberg, P. *et al.* Expression of a hypoglycosylated form of CD86 (B7-2) on human T  
642 cells with altered binding properties to CD28 and CTLA-4. *J. Immunol.* **159**, 4799–4805  
643 (1997).
- 644 18. Huang, Y., Li, Y., Wei, B., Wu, W. & Gao, X. CD80 Regulates Th17 Cell Differentiation  
645 in Coxsackie Virus B3-Induced Acute Myocarditis. *Inflammation* **41**, 232–239 (2018).
- 646 19. Schubart, D. B., Rolink, A., Kosco-Vilbois, M. H., Botteri, F. & Matthias, P. B-cell-specif  
647 ic coactivator OBF-1/OCA-B/Bob1 required for immune response and germinal centre  
648 formation. *Nature* **383**, 538–542 (1996).
- 649 20. Shakya, A. *et al.* Oct1 and OCA-B are selectively required for CD4 memory T cell  
650 function. *J. Exp. Med.* **212**, 2115–2131 (2015).
- 651 21. Stauss, D. *et al.* The transcriptional coactivator Bob1 promotes the development of  
652

- 653 follicular T helper cells via Bcl6. *EMBO J.* **35**, 881–898 (2016).
- 654 22. Stoeckius, M. *et al.* Simultaneous epitope and transcriptome measurement in single cells.  
655 *Nat. Methods* **14**, 865 (2017).
- 656 23. Peterson, V. M. *et al.* Multiplexed quantification of proteins and transcripts in single cells.  
657 *Nat. Biotechnol.* **35**, 936 (2017).
- 658 24. Kumar, B. V *et al.* Human Tissue-Resident Memory T Cells Are Defined by Core  
659 Transcriptional and Functional Signatures in Lymphoid and Mucosal Sites. *Cell Rep.* **20**,  
660 2921–2934 (2017).
- 661 25. Szabo, P. A. *et al.* A single-cell reference map for human blood and tissue T cell  
662 activation reveals functional states in health and disease. *bioRxiv* 555557 (2019).
- 663 26. Stubbington, M. J. T., Rozenblatt-Rosen, O., Regev, A. & Teichmann, S. A. Single-cell  
664 transcriptomics to explore the immune system in health and disease. *Science* **358**, 58–63  
665 (2017).
- 666 27. Tanay, A. & Regev, A. Scaling single-cell genomics from phenomenology to mechanism.  
667 *Nature* **541**, 331 (2017).
- 668 28. Mimitou, E. P. *et al.* Multiplexed detection of proteins, transcriptomes, clonotypes and  
669 CRISPR perturbations in single cells. *Nat. Methods* **16**, 409–412 (2019).
- 670 29. Schwanhäusser, B. *et al.* Global quantification of mammalian gene expression control.  
671 *Nature* **473**, 337 (2011).
- 672 30. Vogel, C. & Marcotte, E. M. Insights into the regulation of protein abundance from  
673 proteomic and transcriptomic analyses. *Nat. Rev. Genet.* **13**, 227 (2012).
- 674 31. Chang, C., Nakamoto, M., Lai, J., Siddique, I. & Mortimer, S. Simultaneous mRNA,  
675 protein, and immune-repertoire profiling of thousands of single cells. *J. Immunol.* **202**,  
676 131.40 (2019).
- 677 32. Butler, A., Hoffman, P., Smibert, P., Papalexi, E. & Satija, R. Integrating single-cell  
678 transcriptomic data across different conditions, technologies, and species. *Nat. Biotechnol.*  
679 **36**, 411 (2018).
- 680 33. Stuart, T. *et al.* Comprehensive Integration of Single-Cell Data. *Cell* **177**, 1888-1902.e21  
681 (2019).
- 682

## 683 **Figure legends**

684

### 685 **Figure 1. Integrated single-cell targeted multi-omics approach provides a high-resolution**

686 **map of human primary CD4<sup>+</sup> T cells in blood.** (a) Summary of the experimental workflow.

687 FACS plot depicts the sorting strategy for the isolation of the three assessed CD4<sup>+</sup> T cell

688 populations. (b) Two-dimensional plot depicting the IL-7R and IL-2RA expression at the

689 protein level using oligo-tagged antibodies (AbSeq) on each captured single cell. Cells are

690 colored according to their respective sorting gate, as assessed using oligo-conjugated sample-

691 tagging antibodies. (c) UMAP (uniform manifold approximation projection) plot depicting the

692 clustering of all captured CD4<sup>+</sup> single cells using the combined proteomics and transcriptomics

693 data. Expression levels of the CD45RA (black to green) and CD45RO (black to red) isoforms

694 using AbSeq antibodies is depicted in the plot for each cell. Arrow indicates the gradient of

695 decreasing CD45RA and concomitant gain in CD45RO expression associated with the

696 acquisition of a CD4<sup>+</sup> T-cell memory phenotype in response to antigen stimulation.

697

698

### 699 **Figure 2. Combined single-cell transcriptional and proteomics immunophenotyping reveals**

700 **distinct trajectories of CD4<sup>+</sup> T cell differentiation *in vivo*.** (a) UMAP plot depicts the

701 clustering of the resting primary CD4<sup>+</sup> T cells isolated from blood of a systemic lupus

702 erythematosus (SLE) patient. (b) Heatmap depicts the top 10 differentially expressed genes in

703 each identified resting CD4<sup>+</sup> Teff cluster. (c) UMAP plots depicting the expression of the CD4<sup>+</sup>

704 T-cell lineage-defining transcription factors TBET (Th1) and RORγt (Th17) in resting CD4<sup>+</sup> T

705 cells. Arrows indicate the gradient of the expression of the respective transcription factor,

706 recapitulating the identified axis of CD4<sup>+</sup> lineage differentiation. (d) Expression of the effector-

707 type cytokine transcripts *IFNγ*, *NKG7*, *PRF1*, *CCL5*, *GZMH* and *GZMK* in resting CD4<sup>+</sup> T cells.

708

709

### 710 **Figure 3. Identification of a trajectory of human CD4<sup>+</sup> regulatory T cell (Treg) activation.**

711 (a) UMAP plot depicts the expression of the canonical Treg transcription factor FOXP3 in the

712 identified resting CD4<sup>+</sup> T-cell clusters. (b) Heatmap depicts the top 10 differentially expressed

713 genes within the four identified resting Treg clusters. (c) Plot depicts the overlaid expression of

714 two key CD4<sup>+</sup> T-cell transcription factor *BACH2* (black to green) and *PRDMI* (encoding  
715 BLIMP-1; black to red). (d) Illustrative example of the expression of highly differentially  
716 expressed genes within the cluster of activated Tregs (cluster 3), including *HLA-DRA* and  
717 *DUSP4* at the mRNA level and CD39, CCR4, CD80 and CD86 at the protein level. (e). Violin  
718 plots depict the normalised expression of *CCR9*, *ITGA4* and the transcription factor *POU2AF1* in  
719 each defined CD4<sup>+</sup> T cell cluster.

720

721

722 **Figure 4. Data from independent experiments can be robustly integrated.** (a) UMAP plot  
723 depicts the clustering of resting primary CD4<sup>+</sup> T cells from one systemic lupus erythematosus  
724 (SLE; n = 9,708 cells) patient, one type 1 diabetes (T1D; n = 7,042 cells) patient and one healthy  
725 donor (n = 7,197 cells). Data was integrated from two independent experiments using the same  
726 CD4<sup>+</sup> T-cell FACS sorting strategy (described in **Fig. 1a**). (b) Alignment of the integrated  
727 targeted transcriptomics and proteomics data generated from the three assessed donors in two  
728 independent experiments. (c) UMAP plots depict the donor-specific clustering of the CD4<sup>+</sup> T  
729 cells. (d) Relative proportion of the identified CD4<sup>+</sup> T cell clusters in each donor. Frequencies  
730 were normalised to either the annotated naïve or memory compartments to ensure higher  
731 functional uniformity of the assessed T-cell subsets and to avoid alterations associated with the  
732 declining frequency of naïve cells with age. (e) Relative expression of the canonical Th1  
733 transcription factor *TBX21* (encoding TBET) and the effector cytokines *NKG7* and *PRF1* on the  
734 three assessed donors.

735

736

737 **Figure 5. Resting human primary CD4<sup>+</sup> T-cells in circulation display variable and modest**  
738 **levels of correlation between mRNA and protein expression at the single-cell level.** (a, b)  
739 Plots depict the correlation (Pearson correlation coefficient) between mRNA and protein  
740 expression for 26 markers with concurrent mRNA and protein expression data in resting (a) and  
741 *in vitro* stimulated (b) CD4<sup>+</sup> T cells. Correlation was calculated in all CD4<sup>+</sup> T cells (blue) or in  
742 the CD45RA<sup>+</sup> naïve (red) or CD45RA<sup>-</sup> memory T-cell subsets separately.

743

744

745 **Figure 6. Targeted scRNA-seq and proteomics approach delineates distinct functional**  
746 **subsets in a heterogeneous CD45<sup>+</sup> immune cell population isolated from blood and tissue.**  
747 **(a)** UMAP plot depicts the clustering of the targeted scRNA-seq and transcriptional data of a  
748 heterogeneous population of total CD45<sup>+</sup> cells isolated from blood and a matched paired  
749 duodenal biopsy from two coeliac disease (CD) patients with active disease. **(b)** Sample tag  
750 information identifies samples isolated from blood (red) or from the paired duodenal biopsy  
751 (teal). **(c, d)** UMAP plot depicting the clustering of the CD45<sup>+</sup> cells isolated from blood **(c)** or  
752 the paired duodenal biopsy **(d)** from the two CD patients. **(e)** Expression of the CD4 at the  
753 protein level (AbSeq) identifies a population of CD4<sup>+</sup> T cells in the small intestine. **(f, g)** UMAP  
754 plots depict the expression of the regulatory T cell (Treg) transcription factor FOXP3 **(f)**, and  
755 protein expression (AbSeq) of the three canonical human T follicular helper cells (Tfh) markers,  
756 CXCR5, ICOS and PD-1 **(g)** in the CD4<sup>+</sup> T cells isolated from tissue. **(h)** Gradient of expression  
757 of the Tfh effector genes *IL21*, *CXCL13* and *BTLA* in tissue-resident CD4<sup>+</sup> T cells.  
758

759 **Supplement**

760

761 **Supplementary Table 1.** FACS and AbSeq anti-human monoclonal antibodies used in this  
762 study.

763

764 **Supplementary Table 2.** Summary of the cell capture efficiency and multiplet rates for the  
765 experiments performed in this study.

766



## 767 **Supplementary Figure legends**

768

### 769 **Supplementary Figure 1. Protein expression displays much larger dynamic range of**

770 **expression.** (a, b) Sequencing saturation metrics of the mRNA (a) and protein (b) libraries.

771 Saturation of the sequencing libraries was quantified as the number of identified distinct, non-

772 clonally amplified cDNA molecules, marked by a unique molecular identifier (UMI), with

773 increasing sequencing coverage. (c) Data shown depicts the distribution (median and range) of

774 the expression of the 42 protein targets measured by AbSeq. Data was derived from the analysis

775 of the first T-cell centric experiment performed on pre-sorted resting CD4<sup>+</sup> T cell populations

776 from a systemic lupus erythematosus (SLE) patient.

777

### 778 **Supplementary Figure 2. Differential expression in the identified resting and *in vitro***

779 **stimulated primary CD4<sup>+</sup> T-cell subsets.** (a, b) Heatmaps depict the top 10 differentially

780 expressed genes in each identified resting (a) or *in vitro* stimulated (b) CD4<sup>+</sup> T-cell clusters.

781 Stimulation condition involved a short period of incubation (90 min) with PMA + ionomycin.

782

### 783 **Supplementary Figure 3. *In vitro* stimulation reinforces the trajectories of CD4<sup>+</sup> T cell**

784 **differentiation.** (a) UMAP plot depicts the clustering of the *in vitro* stimulated primary CD4<sup>+</sup> T

785 cells isolated from blood of a systemic lupus erythematosus (SLE) patient. Stimulation condition

786 involved a short period of incubation (90 min) with PMA + ionomycin. (b) Data shown depicts

787 the overlaid protein expression levels of the CD45RA (black to green) and CD45RO (black to

788 red) isoforms in each CD4<sup>+</sup> T cell following *in vitro* activation with PMA + ionomycin. (c, d)

789 UMAP plots depict the co-expression of the CD4<sup>+</sup> T-cell lineage-defining CD4<sup>+</sup> Th1

790 transcription factor TBET and the Th1 effector cytokine IFN- $\gamma$  (c), as well as the Th17

791 transcription factor ROR $\gamma$ t and the Th17 effector cytokine IL-22 (d) after *in vitro* stimulation

792 with PMA + ionomycin for 90 min. (e) Expression of the canonical Th2 effector molecule IL-13

793 in *in vitro* stimulated CD4<sup>+</sup> T cells. (f) UMAP plot depicts the expression of the Treg

794 transcription factor FOXP3 and the prototypical CD4<sup>+</sup> Teff cytokine IL-2 in the identified CD4<sup>+</sup>

795 T-cell subsets after *in vitro* stimulation with PMA + ionomycin for 90 min. Arrows indicate

796 gradients of expression of the assessed molecules, and indicate the trajectories of CD4<sup>+</sup> Th

797 lineage differentiation from naïve cells.

798

799 **Supplementary Figure 4. Interplay between the BACH2 and BLIMP-1 transcriptional**  
800 **programmes regulate CD4<sup>+</sup> Treg activation in humans.** (a) UMAP plot depicts the expression  
801 of the canonical Treg transcription factor FOXP3 in the identified *in vitro* stimulated CD4<sup>+</sup> T-  
802 cell clusters. (b) Data shown depicts the overlaid protein expression levels of the transcription  
803 factors BACH2 (black to green) and BLIMP-1 (encoded by *PRDM1*; black to red) in each CD4<sup>+</sup>  
804 T cell following *in vitro* activation with PMA + ionomycin. (c) Heatmap depicts the top 10  
805 differentially expressed genes within the four identified Treg clusters following *in vitro*  
806 stimulation with PMA + ionomycin. (d) UMAP plots depict the gradient of expression of highly  
807 differentially expressed genes in the cluster of activated Tregs (cluster 3) following *in vitro*  
808 stimulation with PMA + ionomycin. Red arrows in this figure indicate the gradient of decreasing  
809 *BACH2* and concomitant gain in *PRDM1* expression associated with the gradual expression of  
810 Treg activation molecules and the acquisition of an activated Treg phenotype.

811

812 **Supplementary Figure 5. Surface expression of the co-stimulatory molecules CD80 and**  
813 **CD86 marks a subset of highly activated CTLA-4<sup>+</sup> human Tregs *in vivo*.** (a,b) UMAP plots  
814 depict the mRNA expression levels of the co-stimulatory molecules CD80 and CD86 in the  
815 identified CD4<sup>+</sup> T-cell subsets in resting (a) and *in vitro* stimulated (b) conditions. Dashed lines  
816 delineate the identified activated Treg clusters. (c) Gating strategy for the delineation of the Treg  
817 subsets according to the intracellular expression of the canonical Treg markers FOXP3 and  
818 HELIOS. (d) Histograms depict the mean fluorescence intensity (MFI) of the CTLA-4  
819 expression in the assessed CD4<sup>+</sup> T cell subsets. CTLA-4, CD80 and CD86 immunostaining was  
820 performed under three different experimental conditions: (i) Surface immunostaining only  
821 (black); (ii) Immunostaining after cell permeabilization and fixation (red); and (iii) Both surface  
822 immunostaining and after cell permeabilization and fixation. (e) Dot plots depict the co-  
823 expression of CTLA-4 and CD86 in CD45RA<sup>-</sup> CD127<sup>low</sup>CD25<sup>+</sup> Tregs (mTregs) and in the  
824 HELIOS-FOXP3<sup>+</sup> mTregs. Flow cytometric data was generated from the intracellular  
825 immunostaining of CTLA-4 and CD86. (f,g) Two dimensional plots depicting the co-expression  
826 of CTLA-4 and CD80 (f) and HLA-DR and CD86 (g) in mTregs. Flow cytometric data was  
827 generated from the intracellular immunostaining of the assessed markers. (h) Dot plots depict the  
828 co-expression between CTLA-4 and either CD80 or CD86 obtained from the surface

829 immunostaining of these proteins in the mTreg subset. Data shown in this figure was generated  
830 from two healthy donors recruited from the Oxford Biobank, depicted in red (freshly isolated  
831 PBMCs) and blue (cryopreserved PBMCs), respectively. Cell frequencies from the respective  
832 donor are also indicated for each assessed population.

833

834 **Supplementary Figure 6. Targeted multi-omics approach reveals trajectories of B cell**

835 **differentiation and class switching in blood and tissue. (a)** UMAP plots depict the clustering

836 of the total CD45<sup>+</sup> immune cells isolated from blood of two coeliac disease (CD) patients with

837 active disease. Dashed lines outline the annotated B-cell and plasma cell subsets annotated from

838 the differentially expressed genes in those clusters. **(b, c)** Expression of key B-cell differentiation

839 and class switching **(b)** and plasma cell **(c)** markers, including *CD27* mRNA and selected surface

840 expressed or secreted immunoglobulin (Ig) receptors in the identified circulating B-cell and

841 plasma cell clusters. **(d)** UMAP plots depict the clustering of the total CD45<sup>+</sup> immune cells

842 isolated from duodenal tissue biopsies. Dashed lines outline the annotated B-cell and plasma cell

843 subsets annotated from the differentially expressed genes in those clusters. **(e, f)** Expression of

844 key B-cell differentiation and class switching **(e)** and plasma cell **(f)** markers, including *CD27*

845 mRNA and selected surface expressed or secreted immunoglobulin (Ig) receptors in the

846 identified in the tissue-resident B-cell and plasma cell clusters.

847

848 **Supplementary Figure 7. Single-cell mRNA and protein quantification identifies distinct**

849 **functional populations of human circulating CD3<sup>+</sup> T cells. (a)** UMAP plot depicts the

850 clustering of circulating CD3<sup>+</sup> T cells isolated from blood of two CD patients with active disease.

851 **(b)** Annotation of the circulating T-cell subsets using the expression profile of CD45RA and

852 additional key lineage defining T-cell markers such as CD4, CD8, *TRDC*, *DPP4* and the effector

853 cytokine gene *NKG7*. **(c)** Heatmap depicts the top 10 differentially expressed genes in each

854 identified circulating CD3<sup>+</sup> T-cell cluster.

855

**a**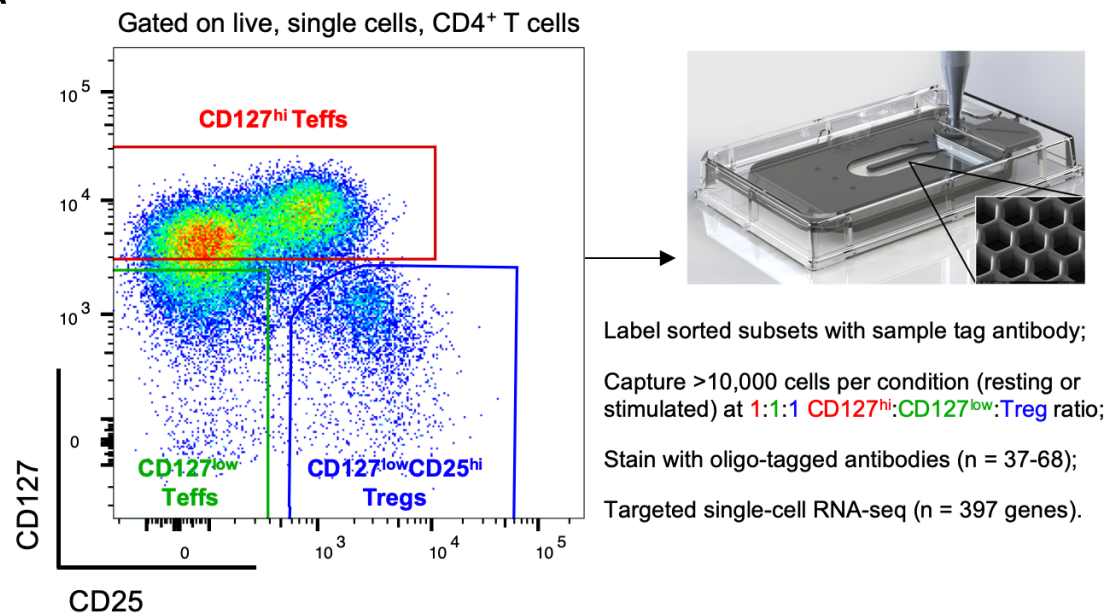**b**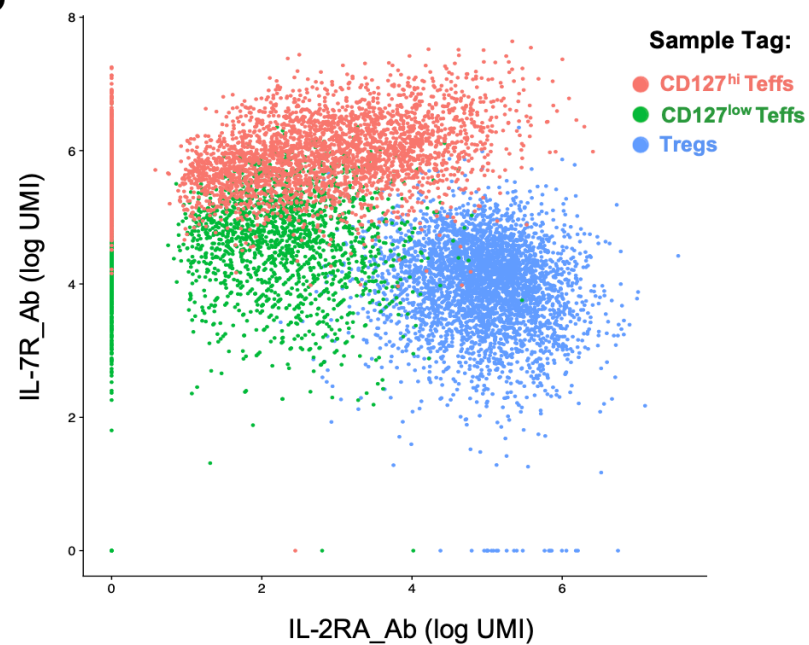**c**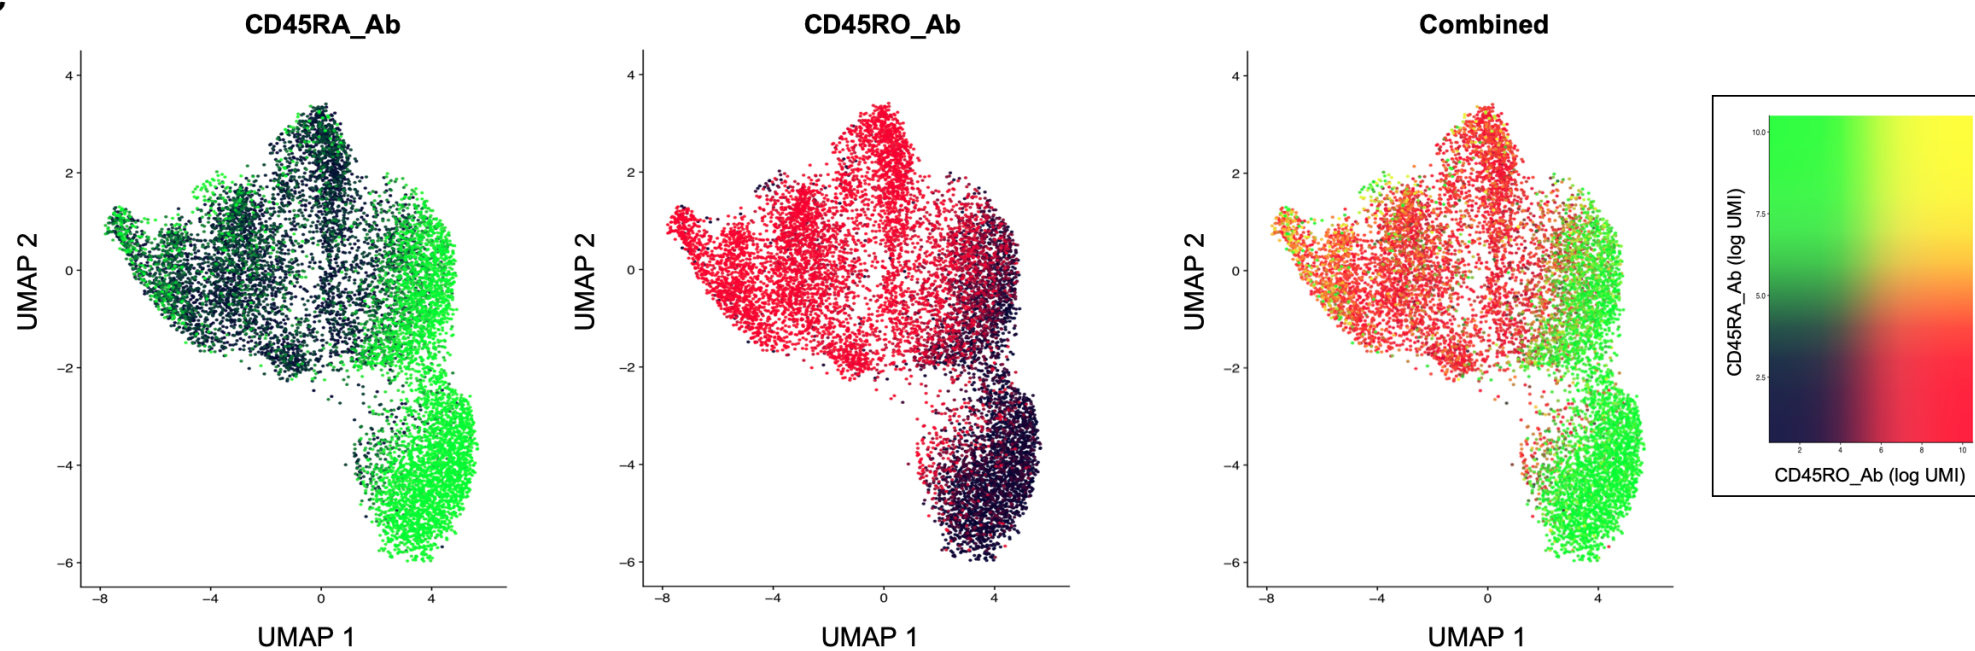



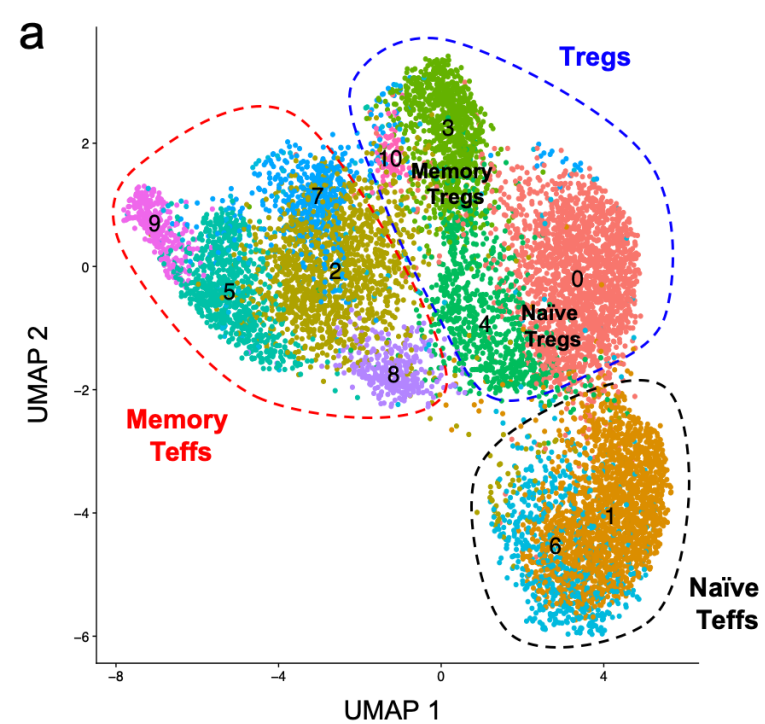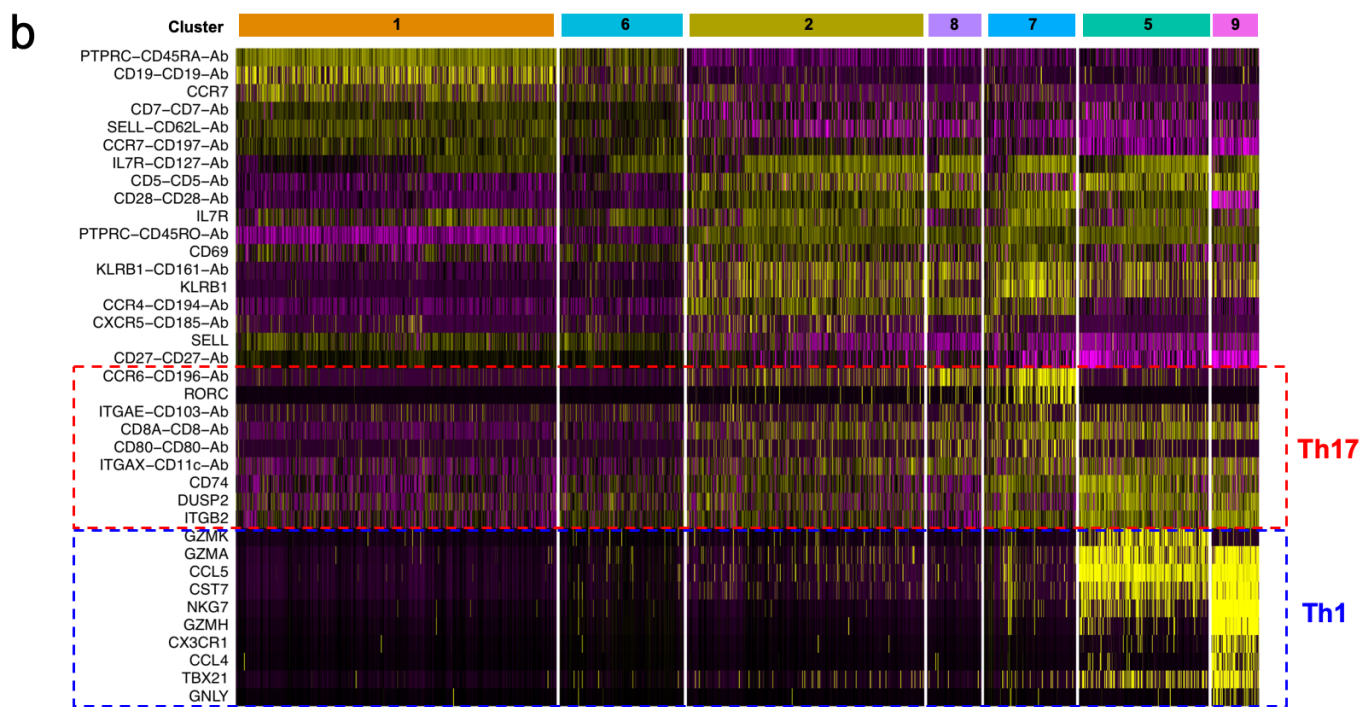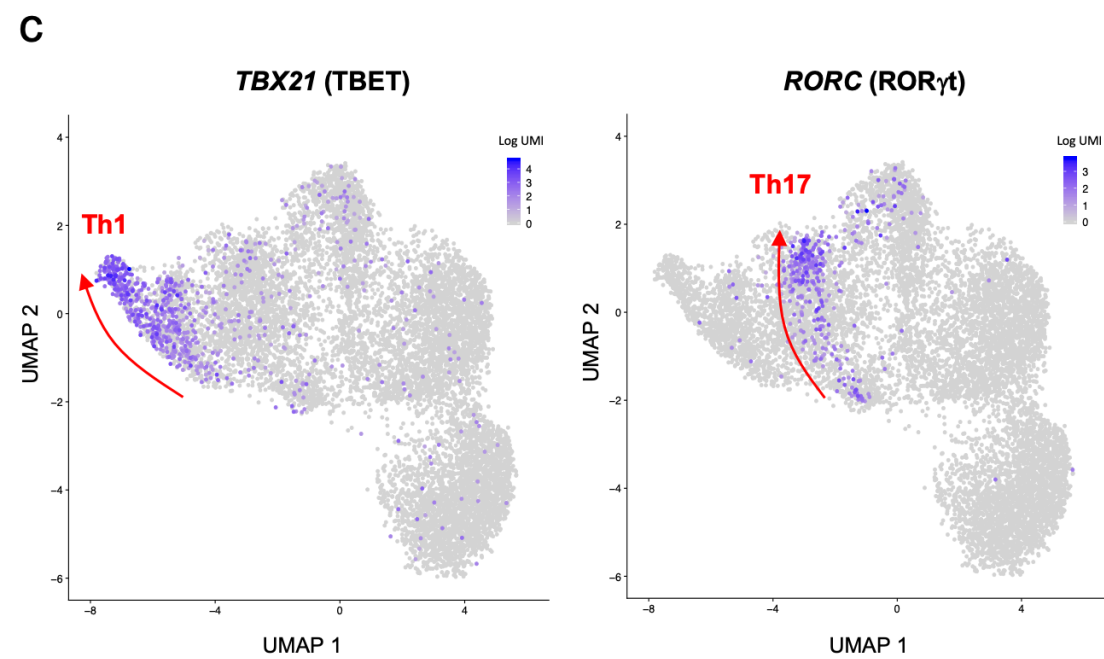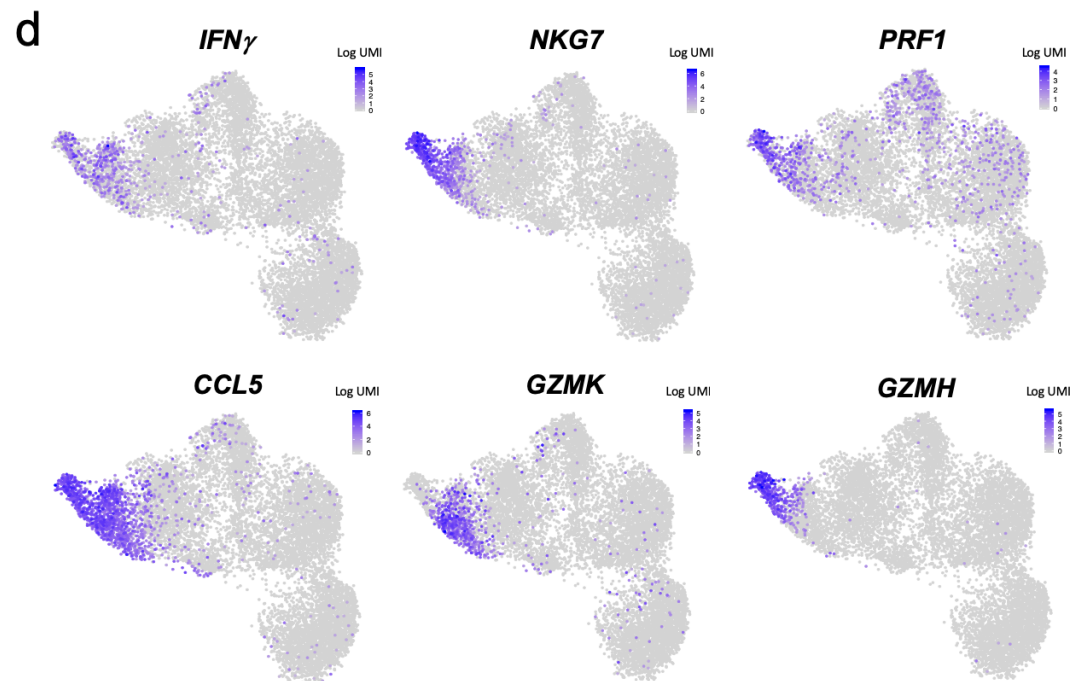

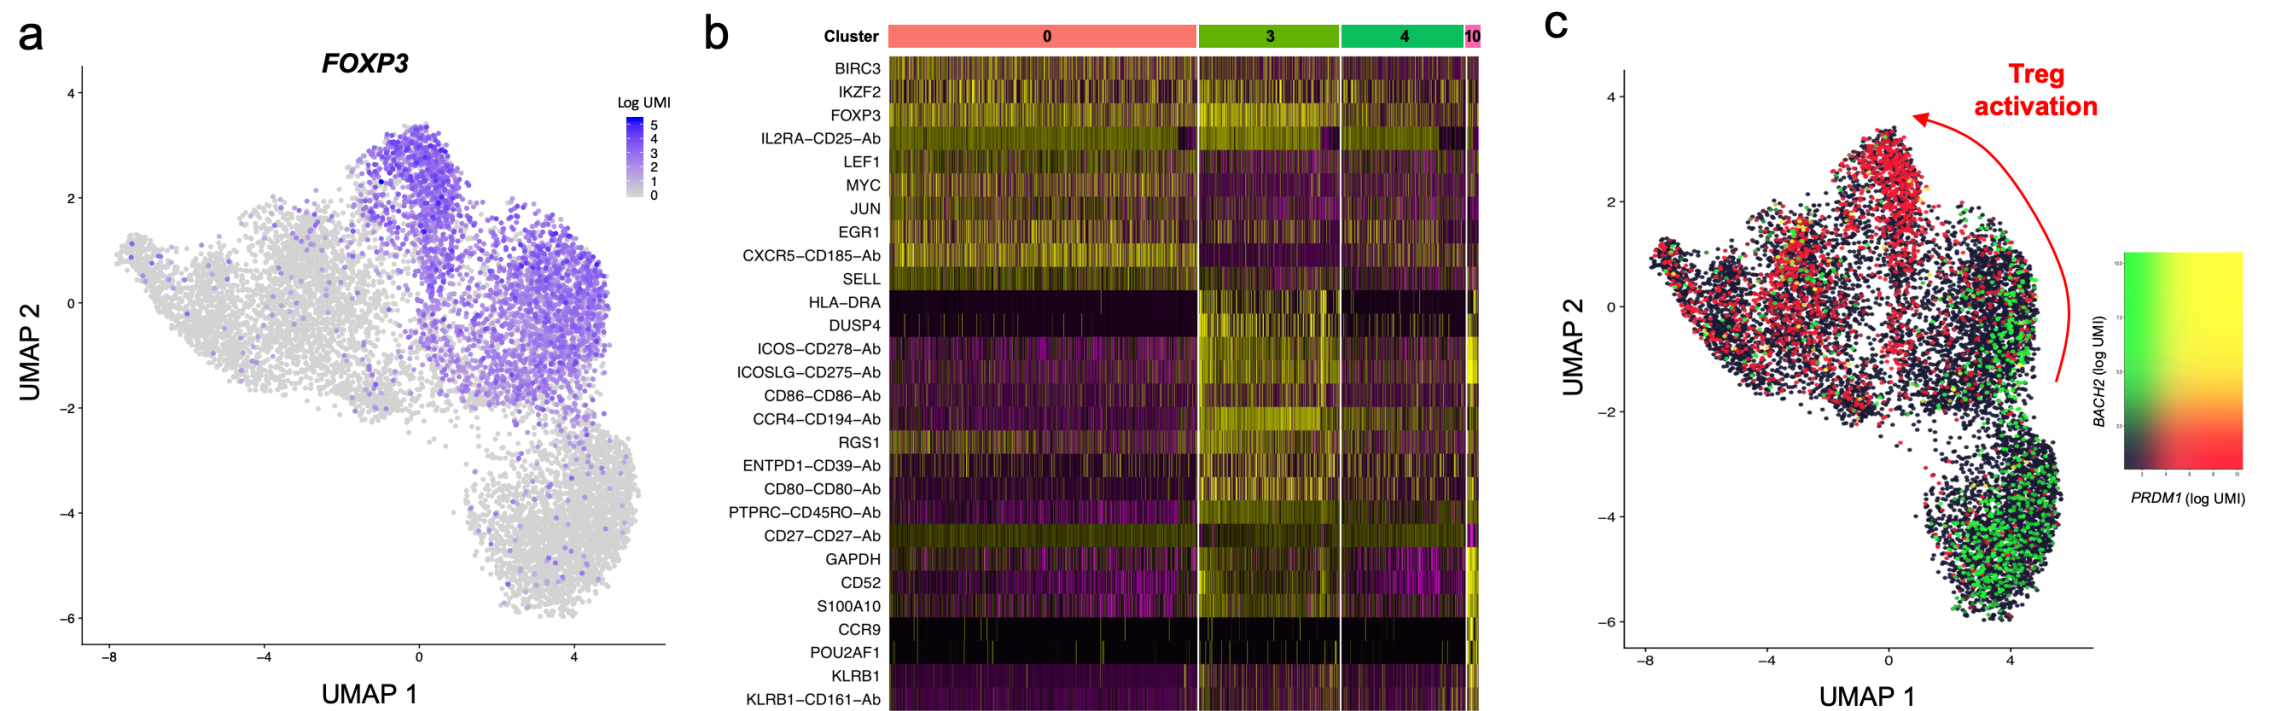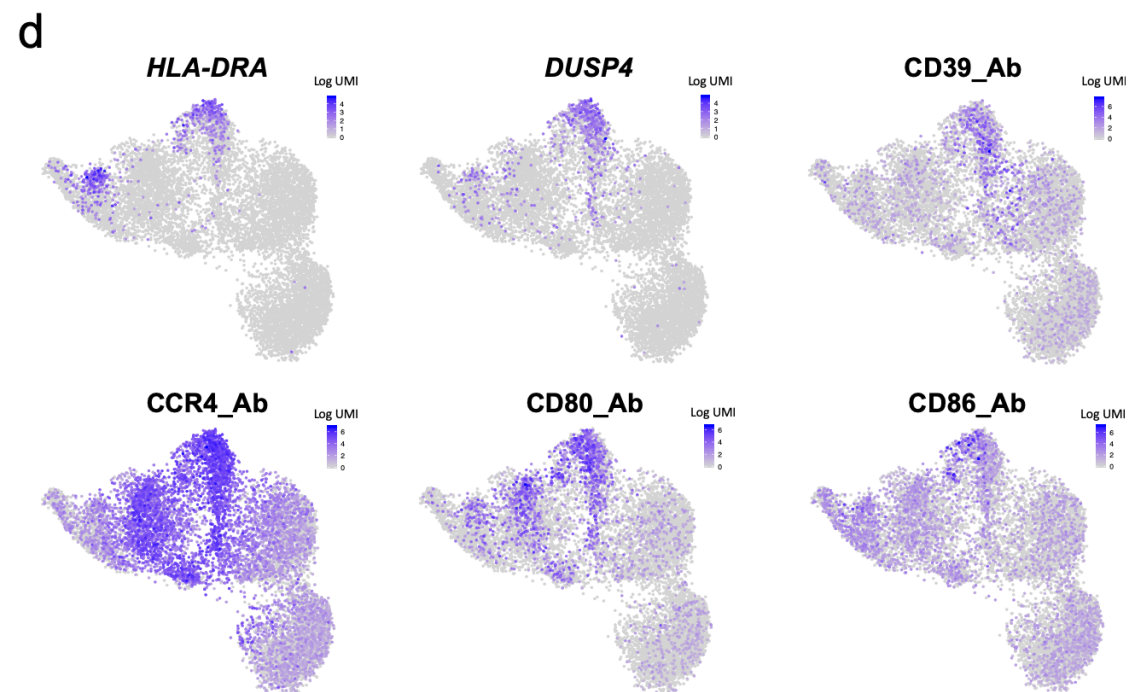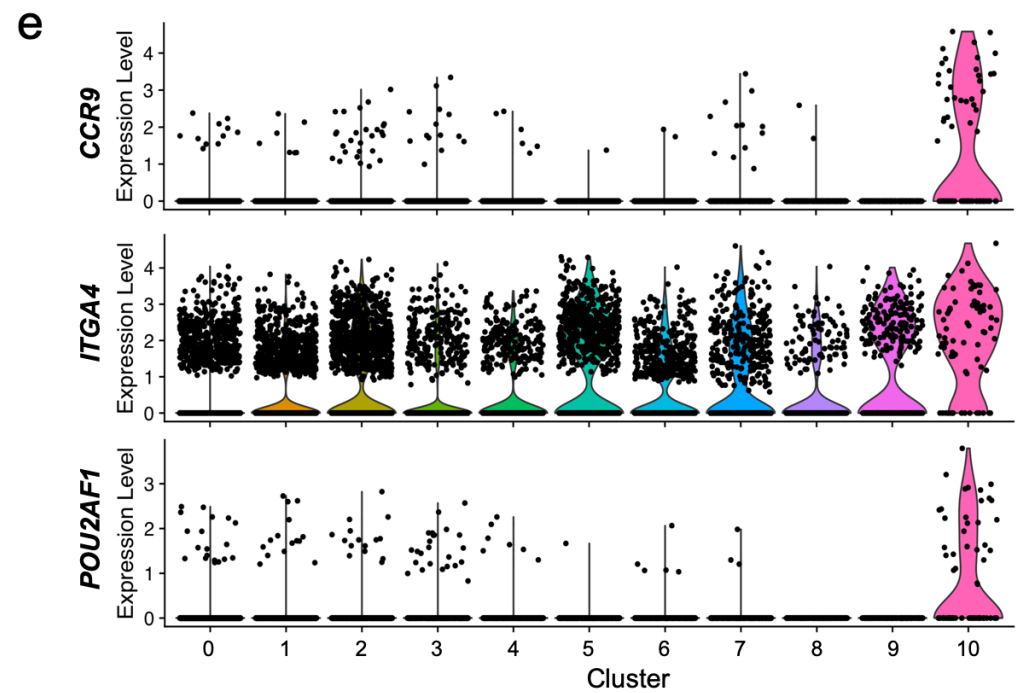



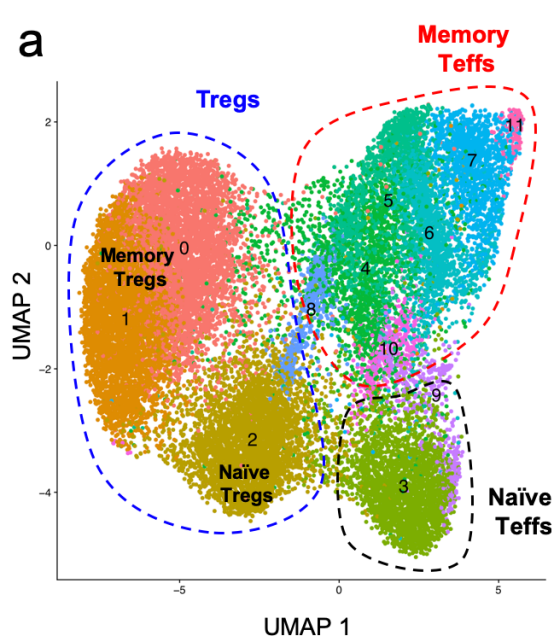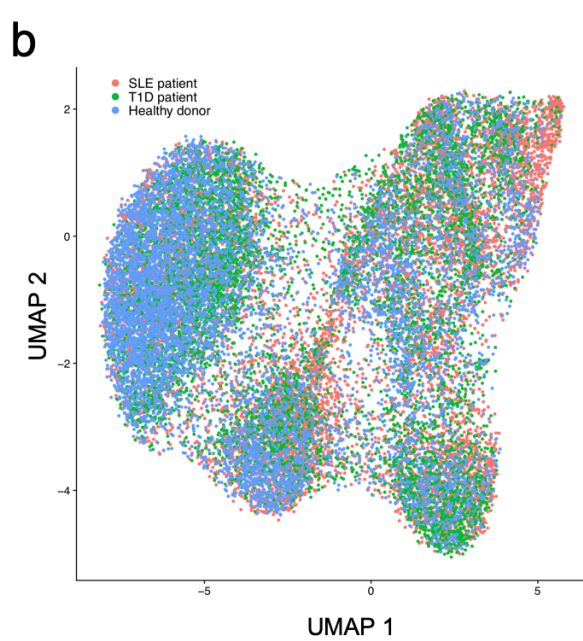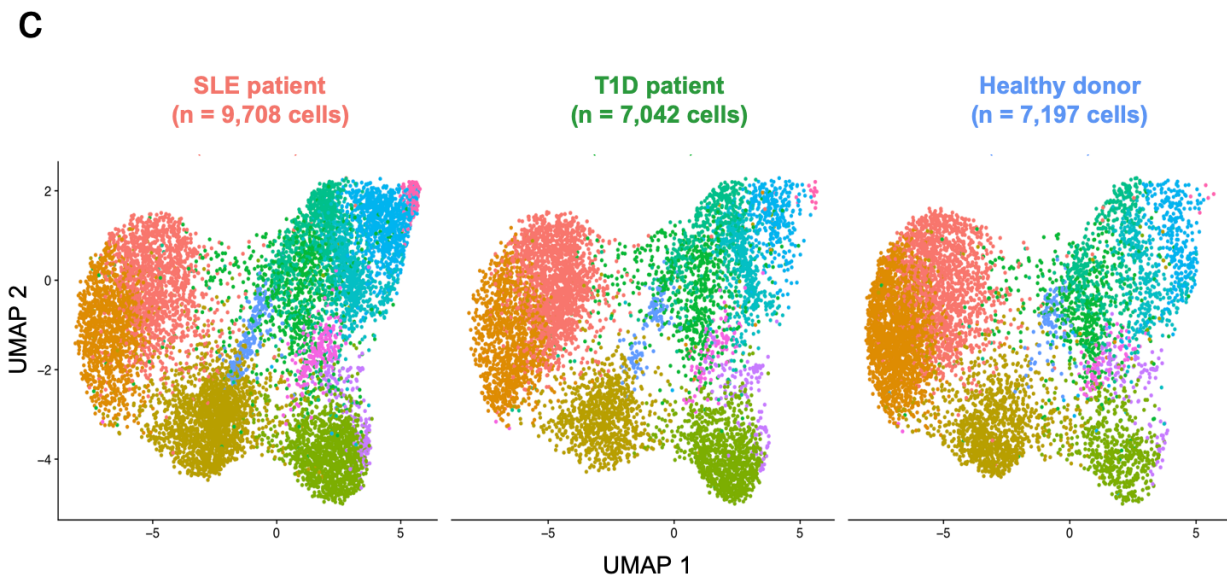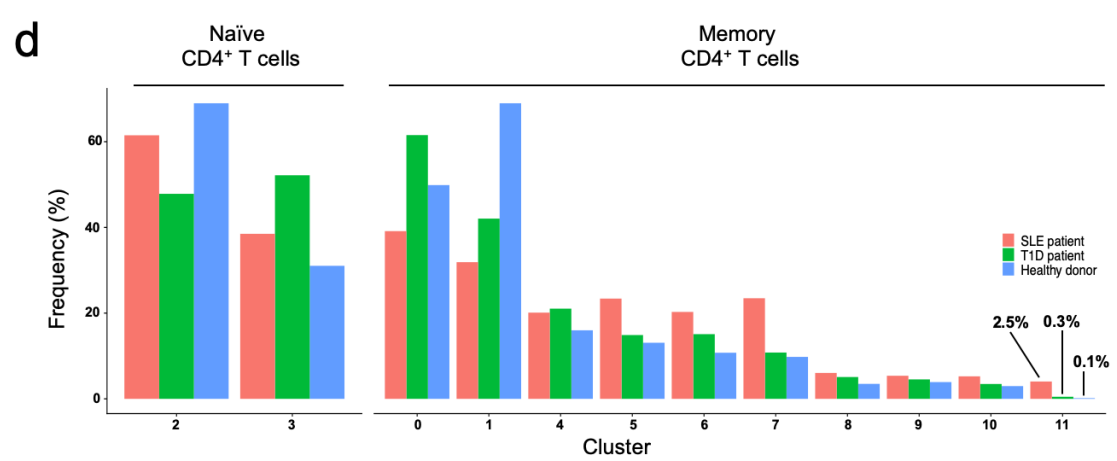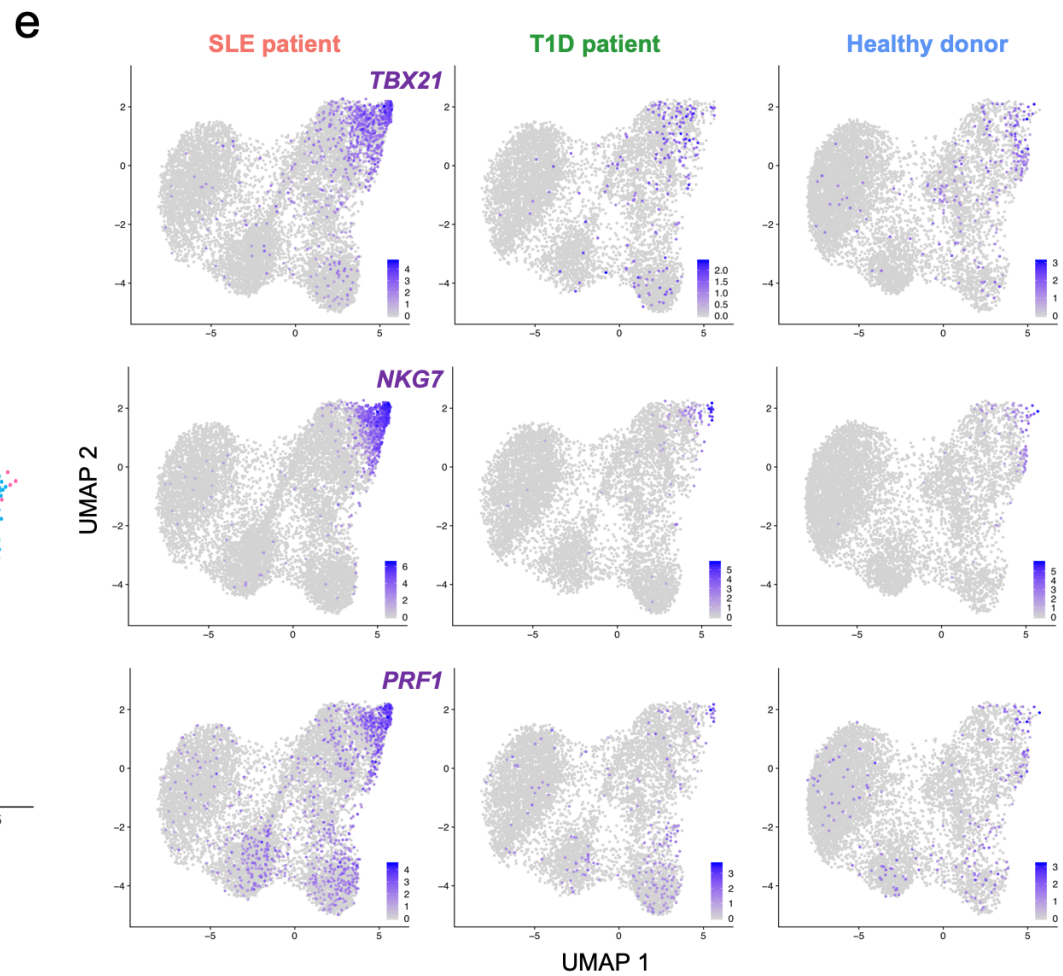

a

Resting

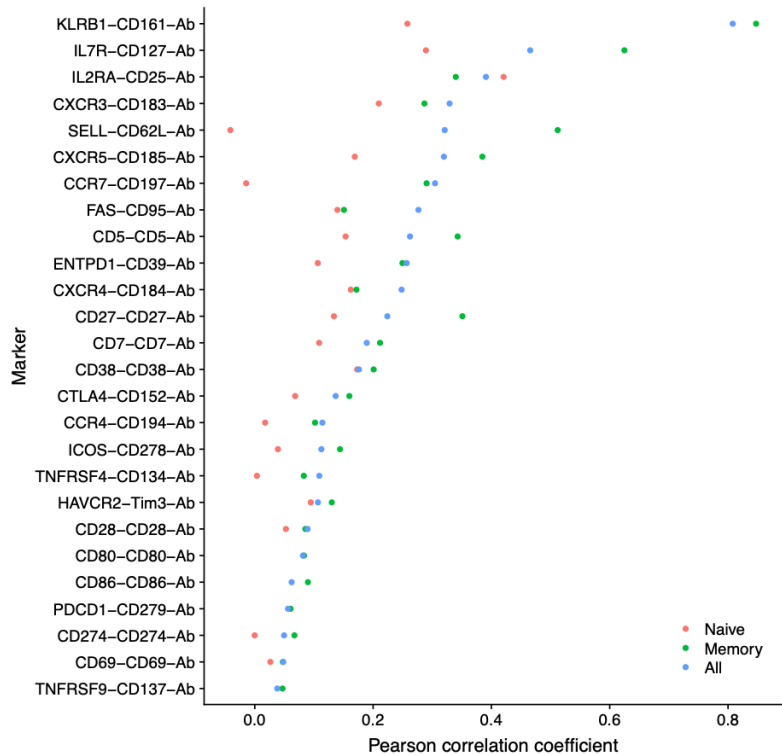

b

*In vitro* stimulated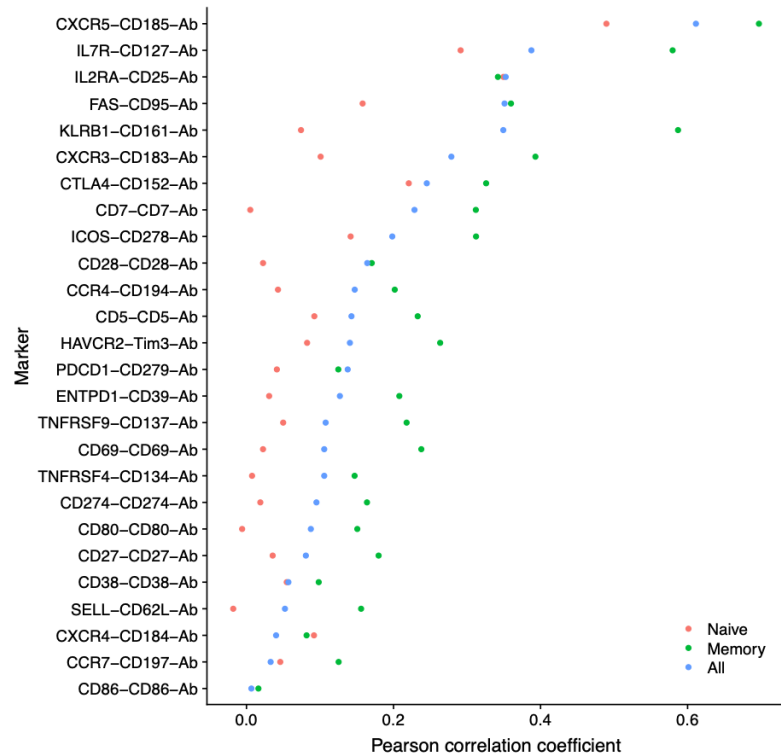



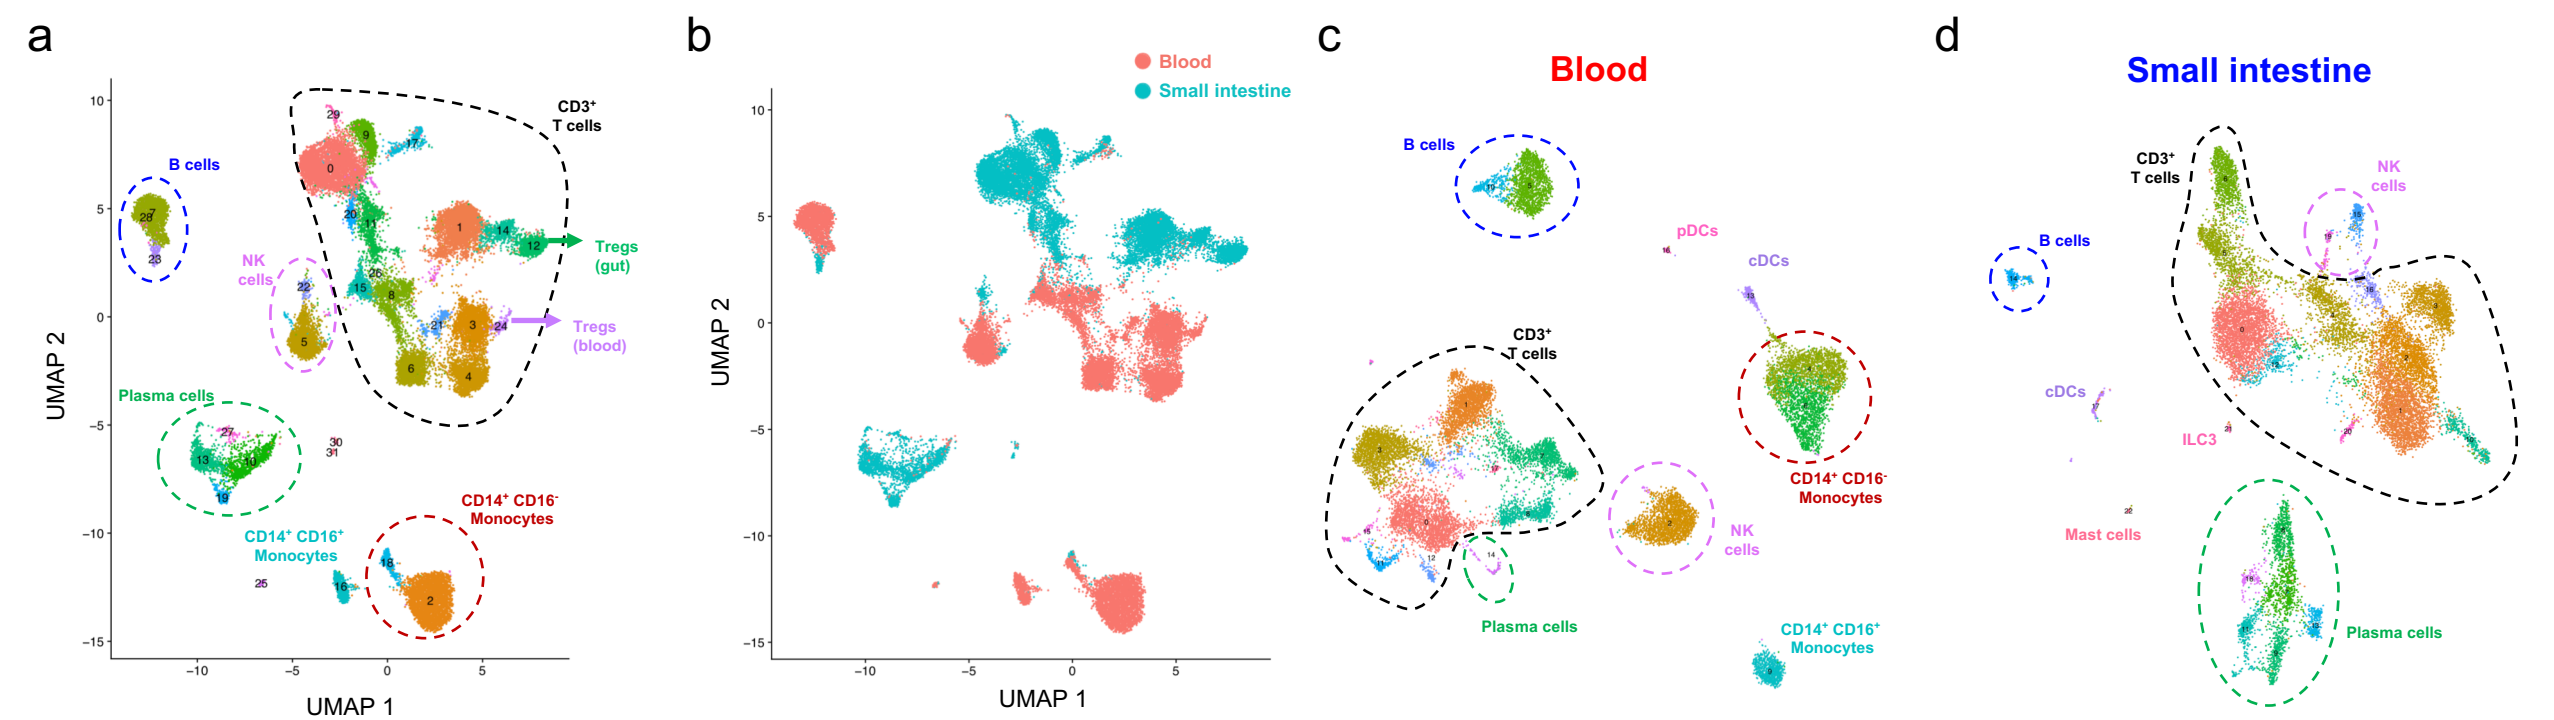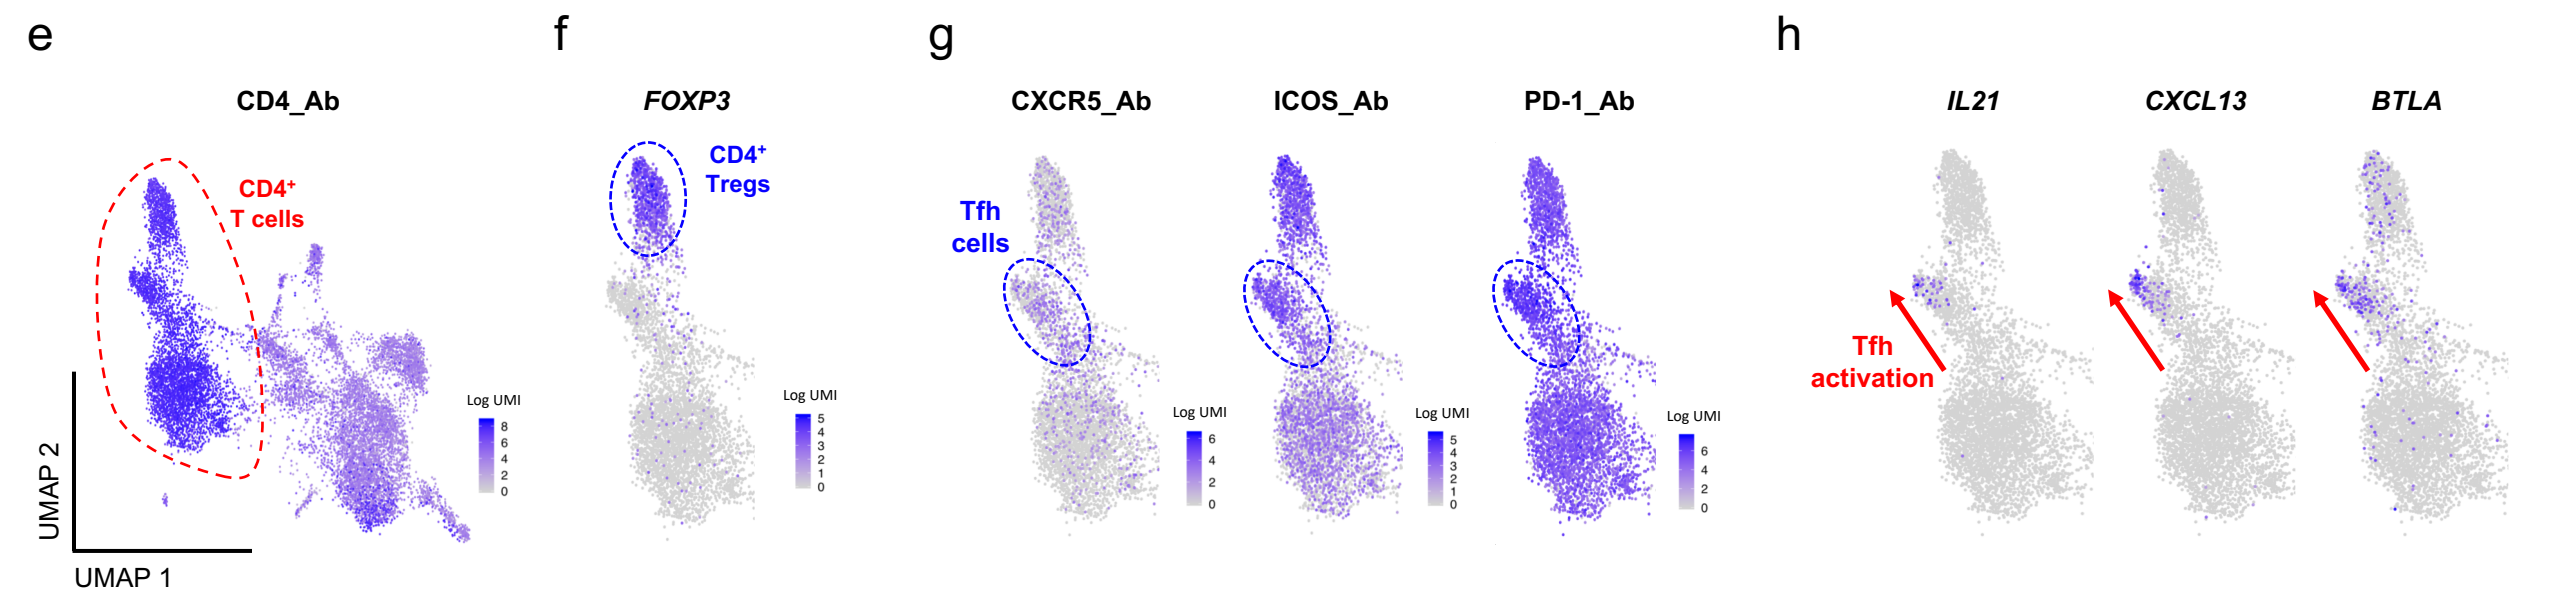

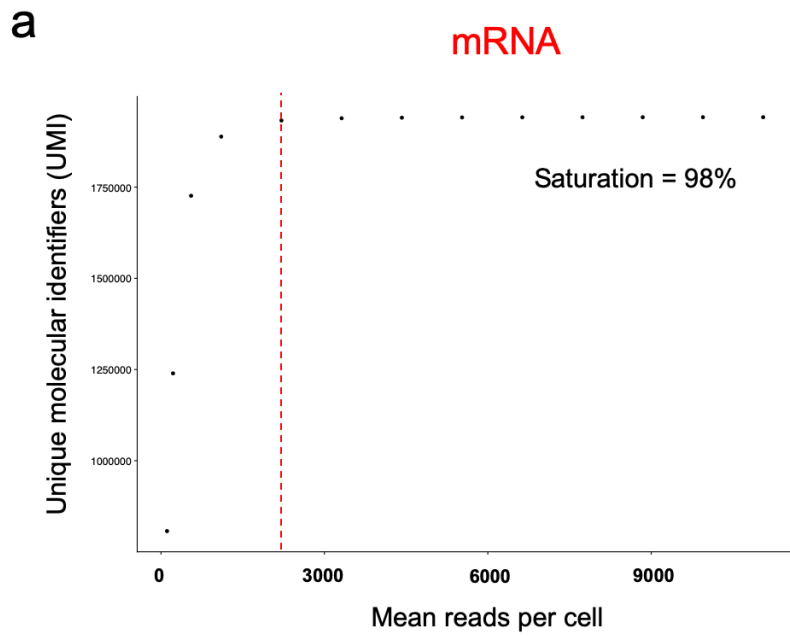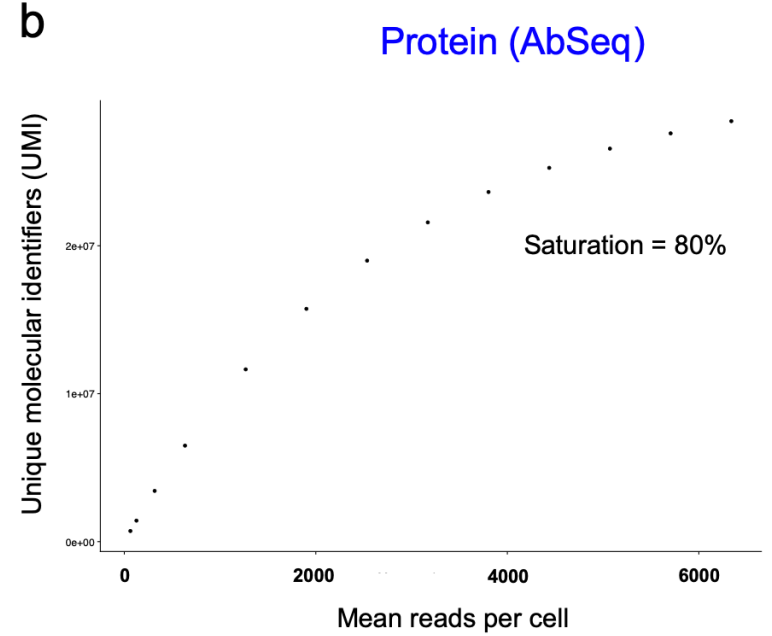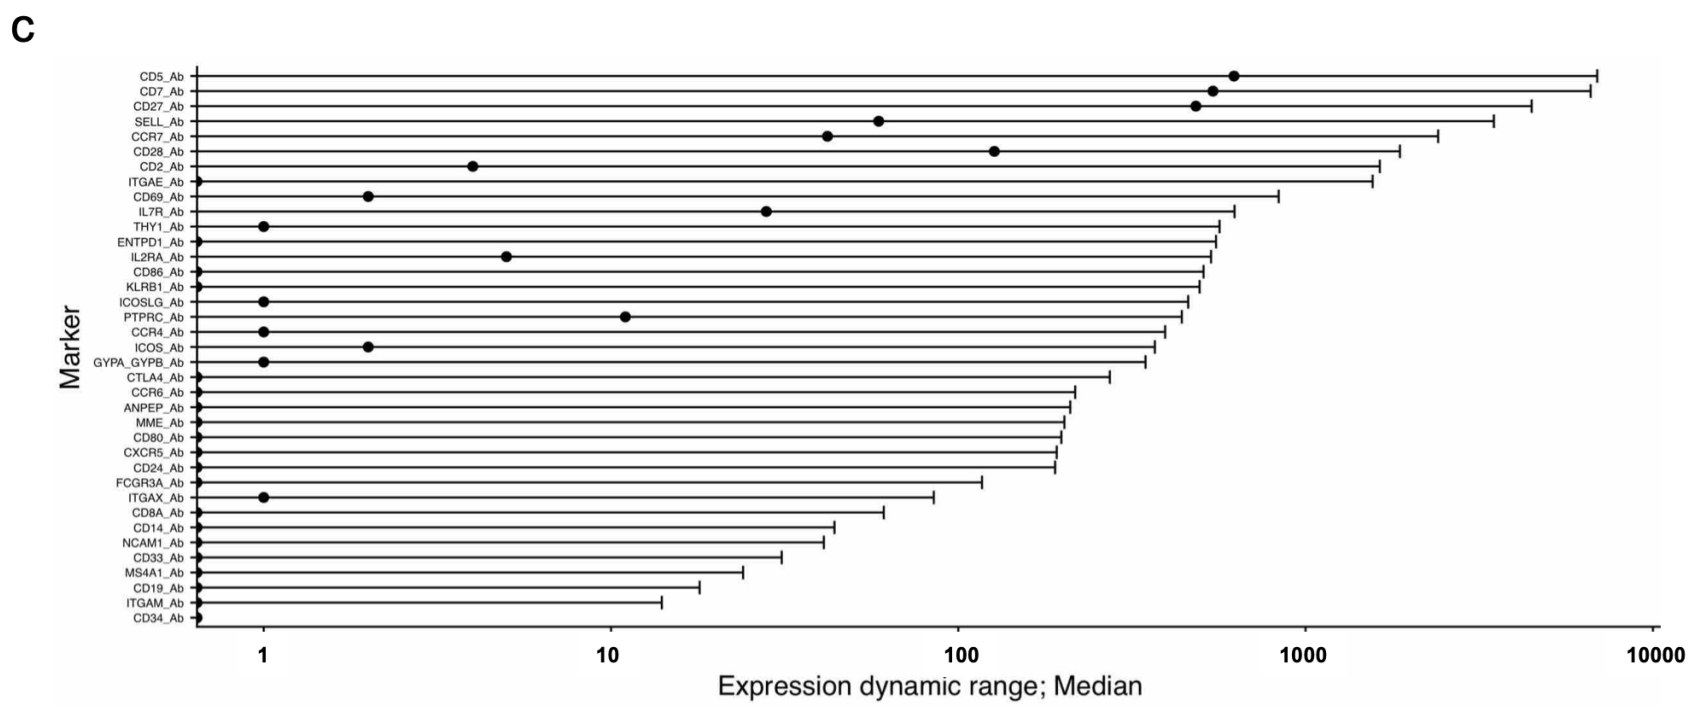

a

Resting

10

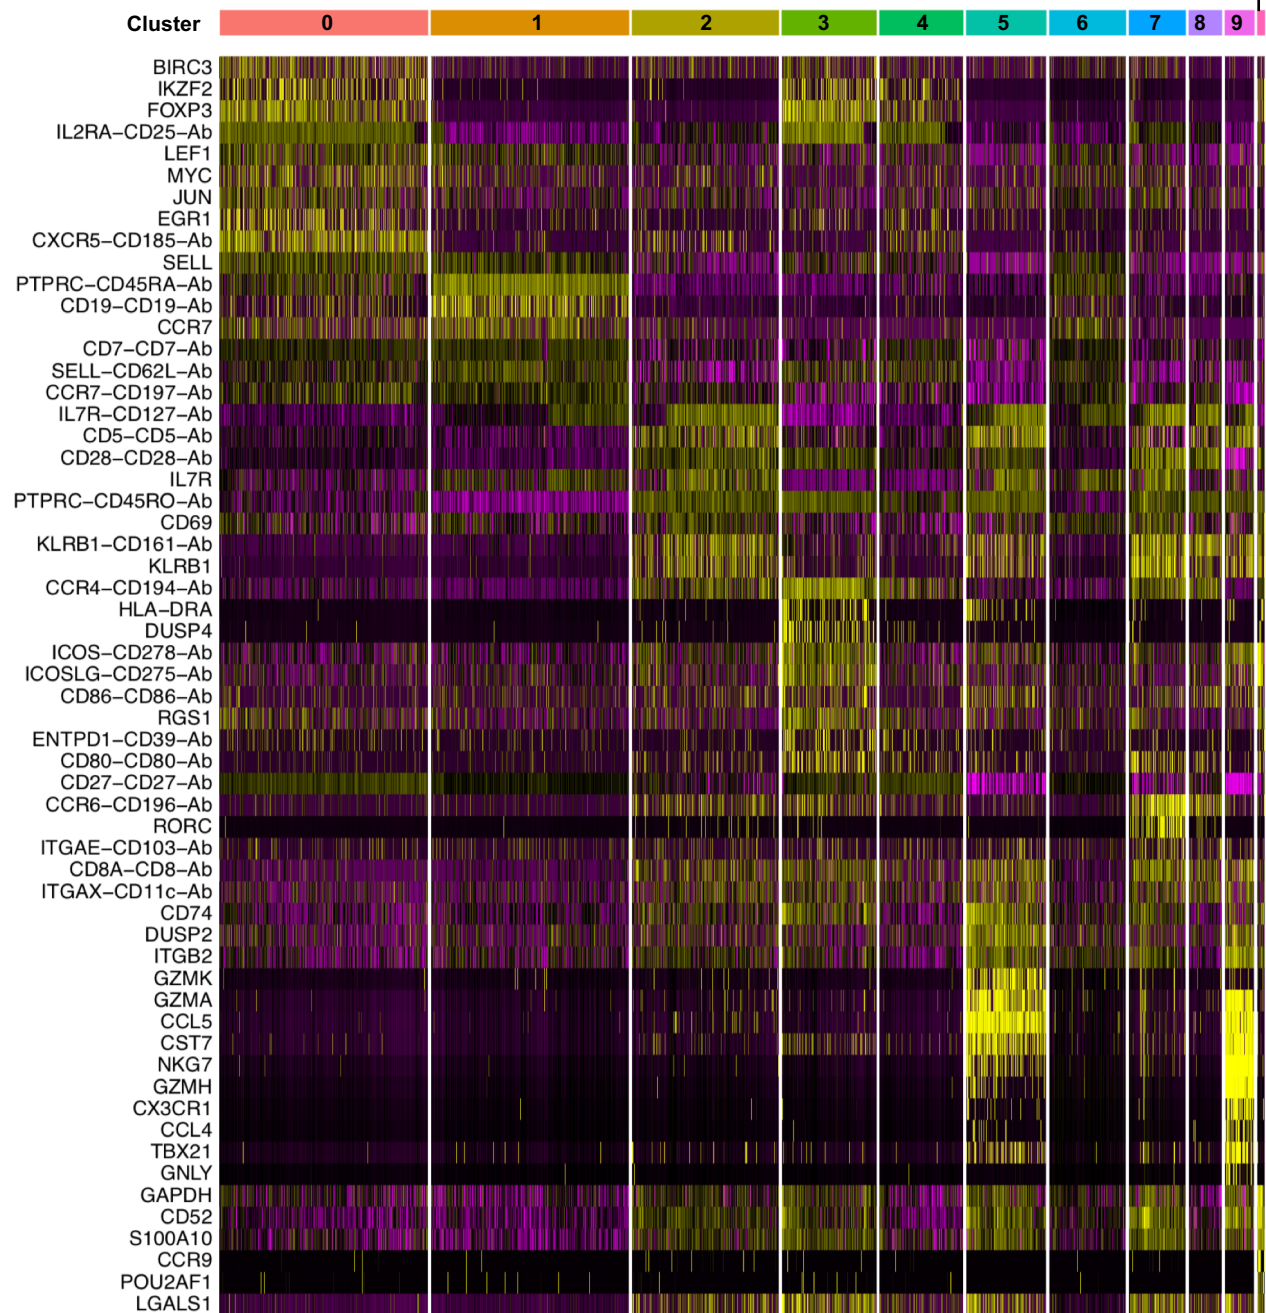

b

*In vitro* stimulated (PMA + ionomycin)

10 11

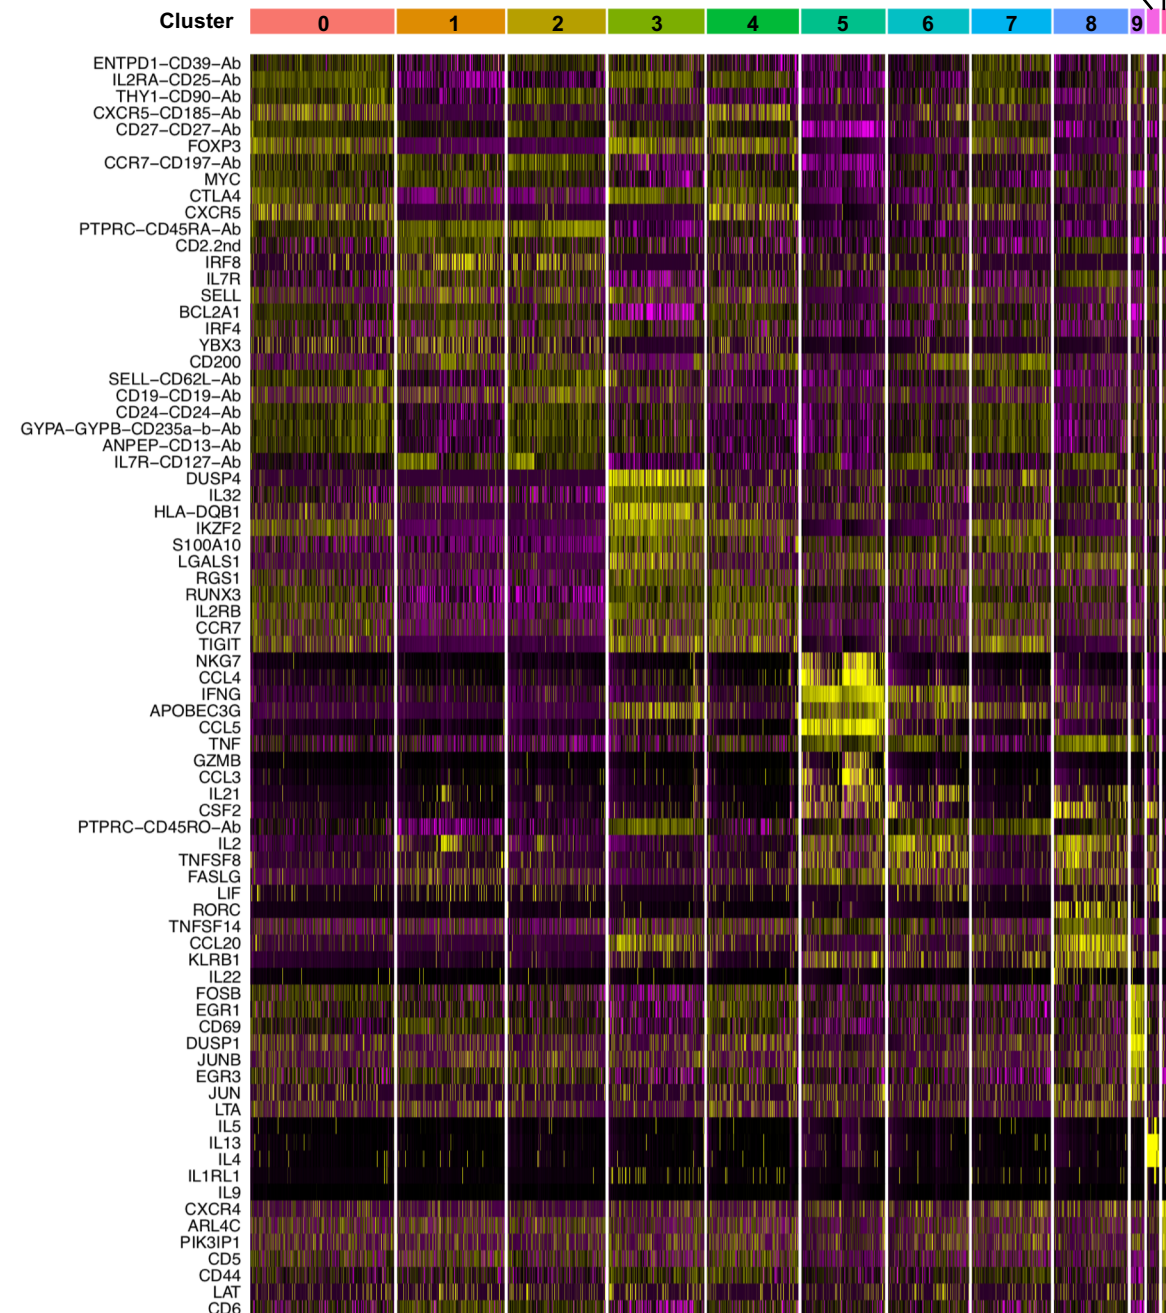

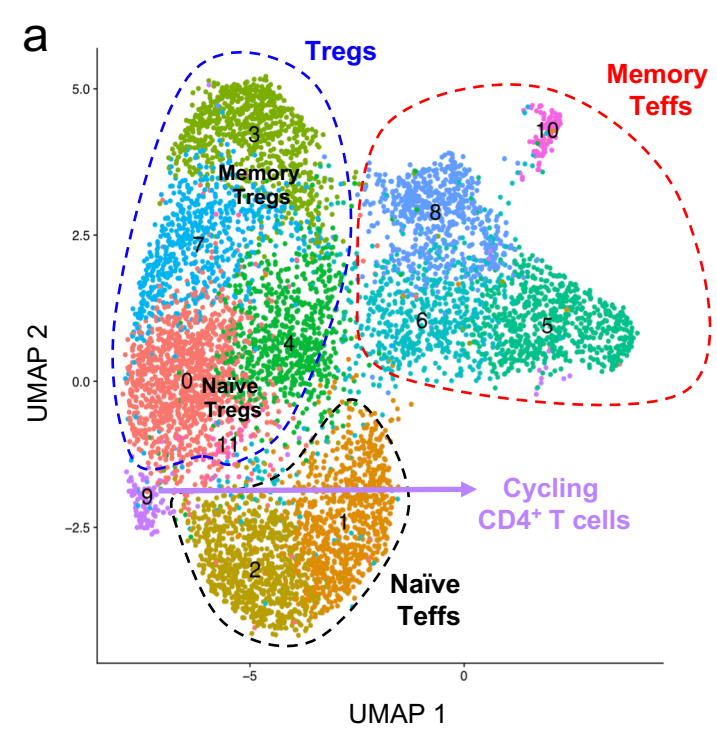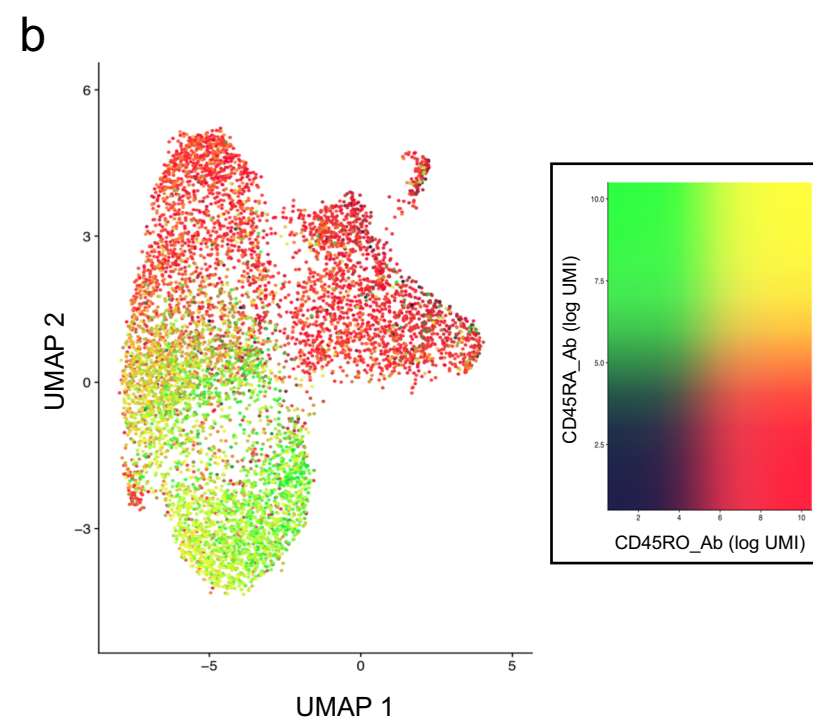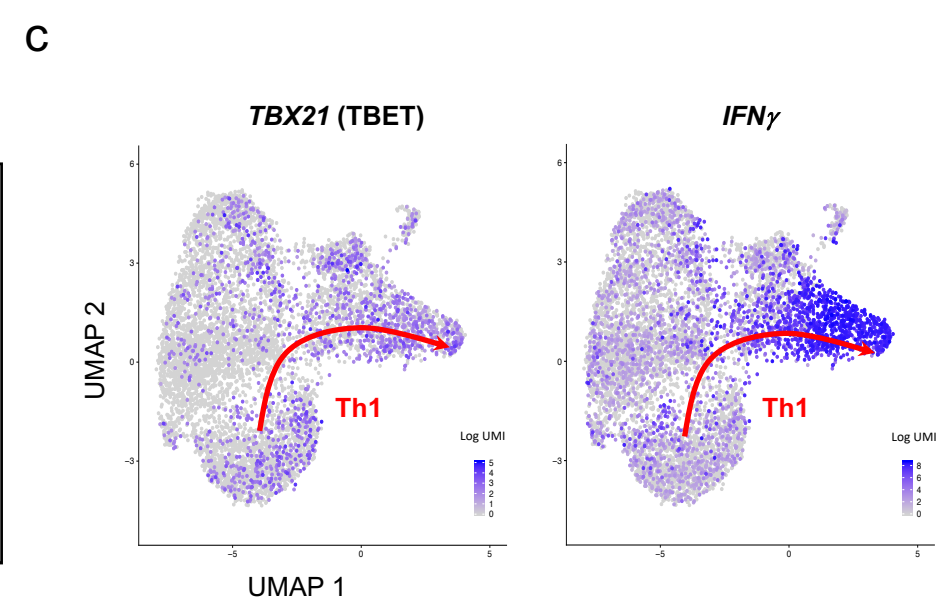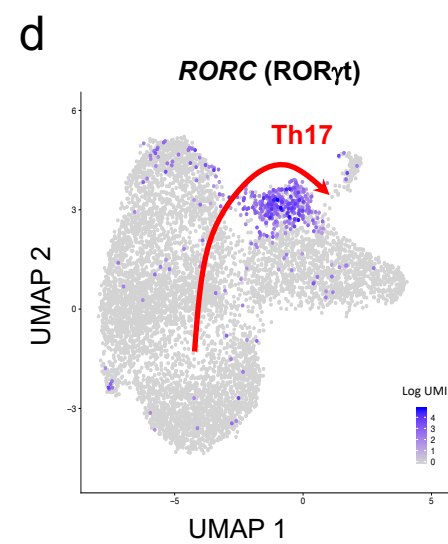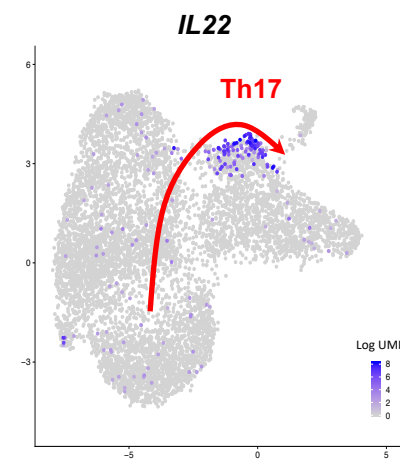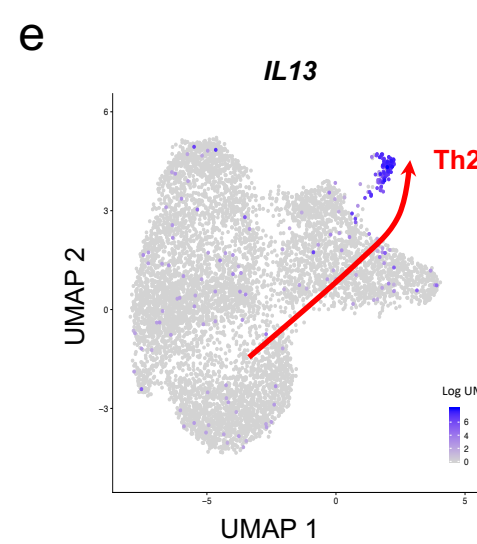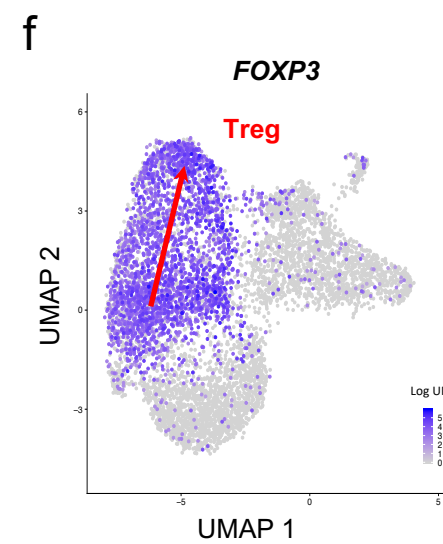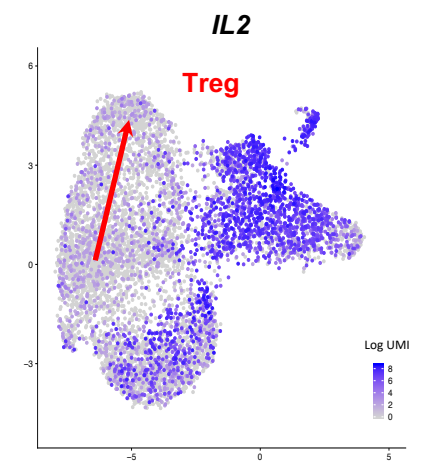



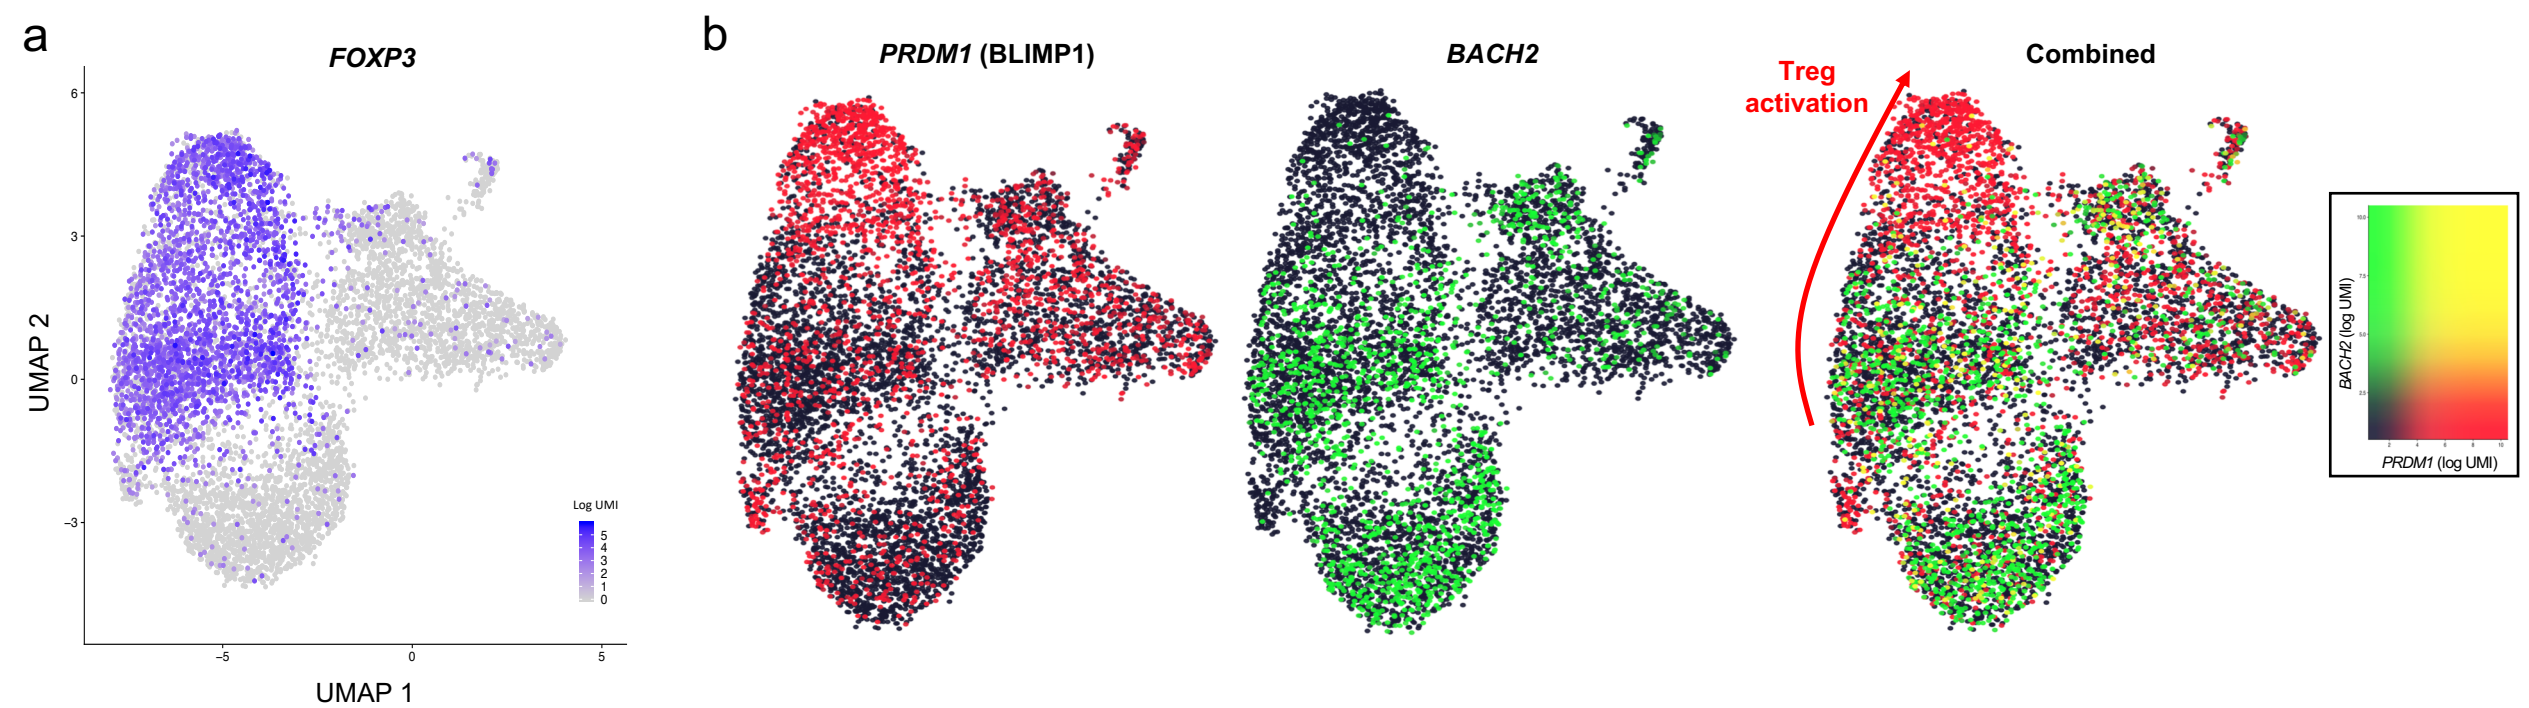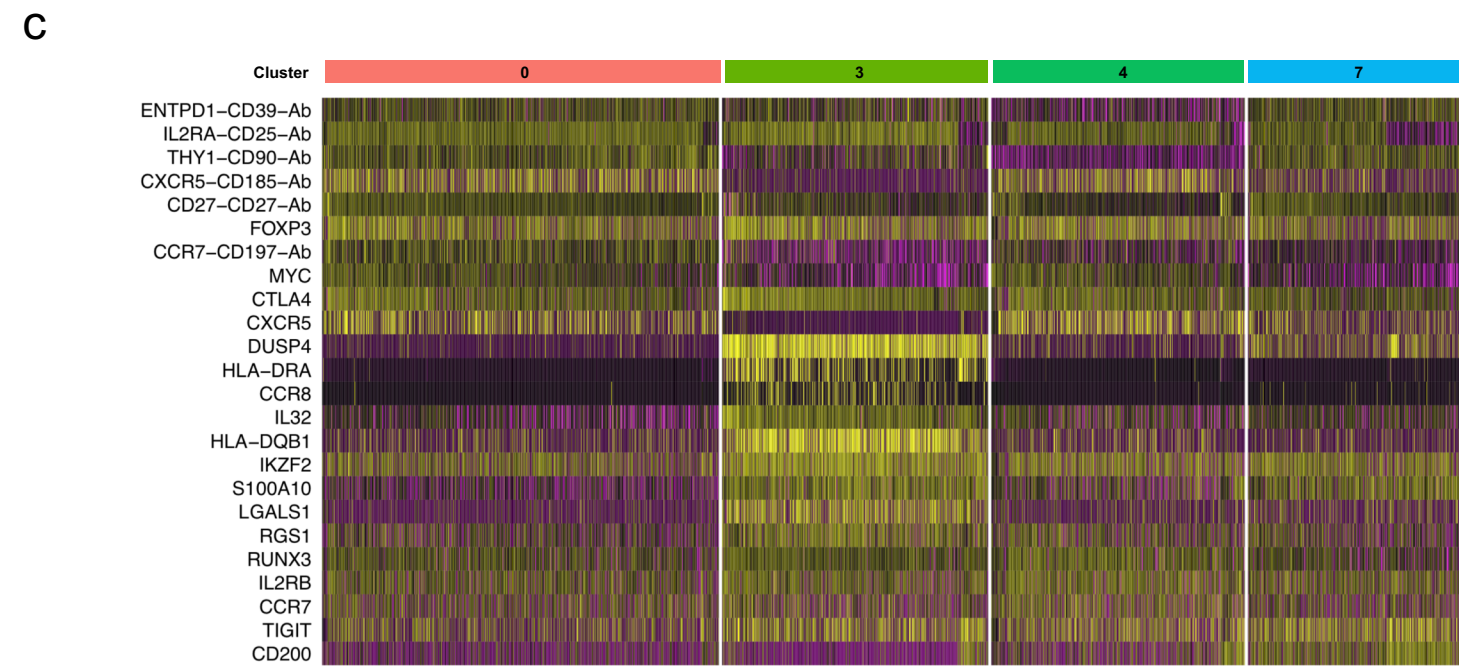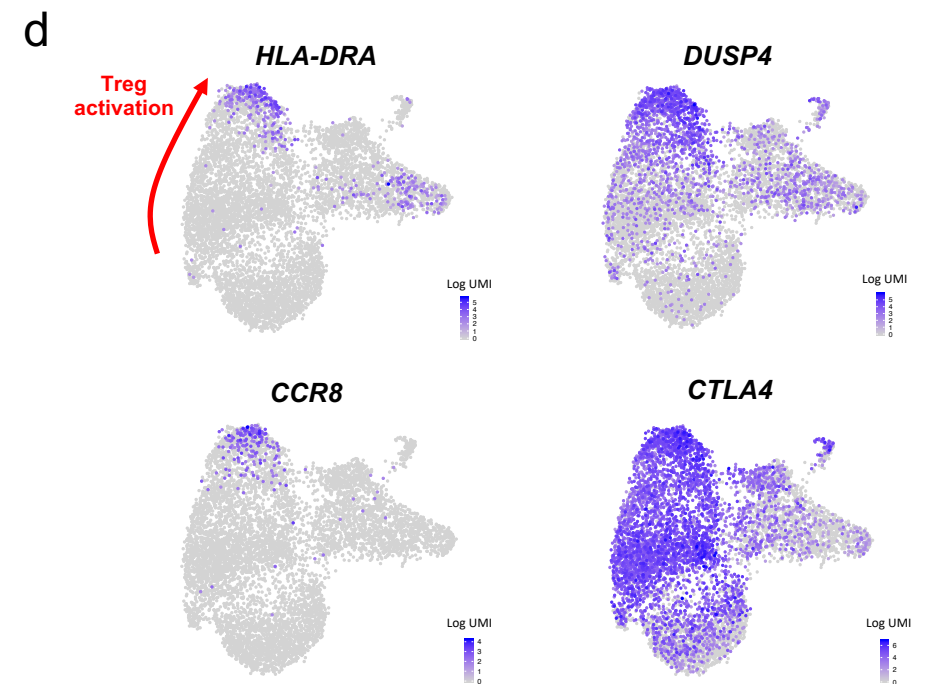

a

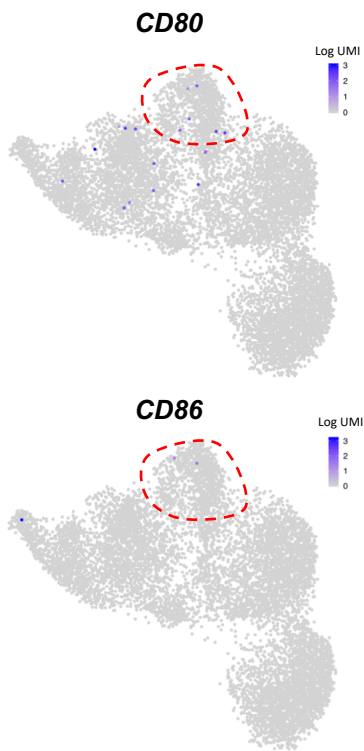

b

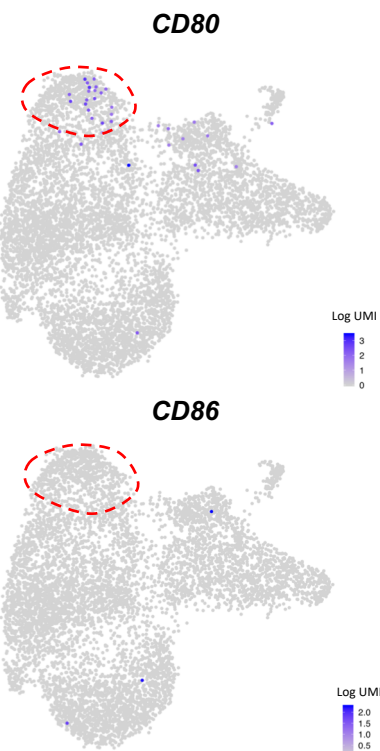

c

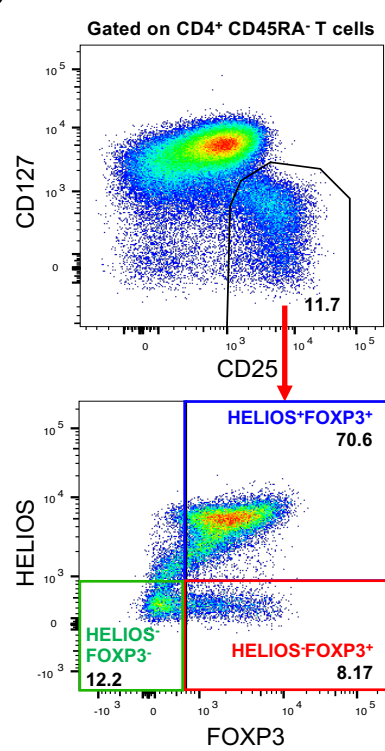

d

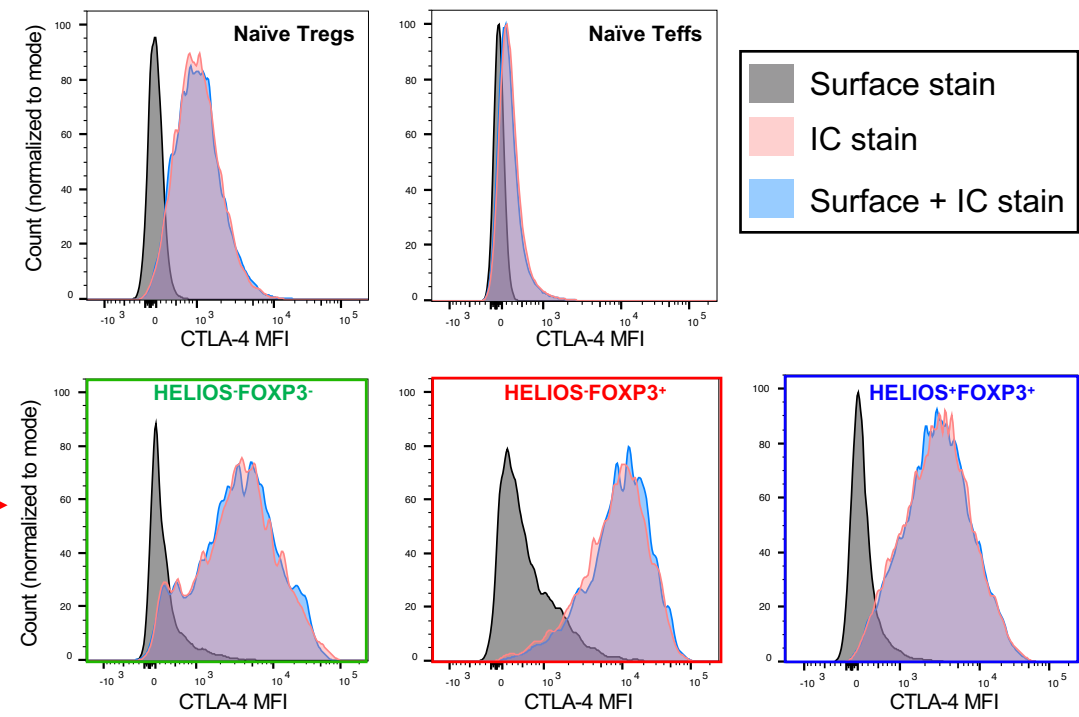

e

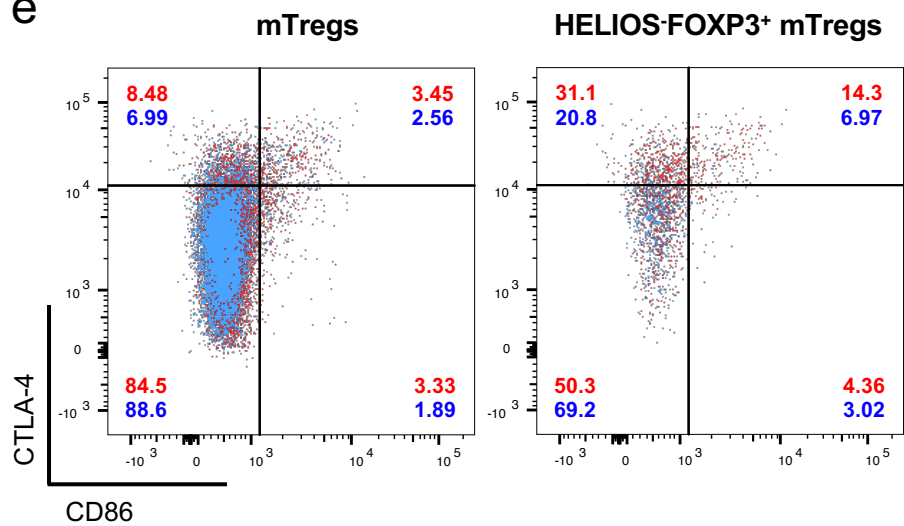

f

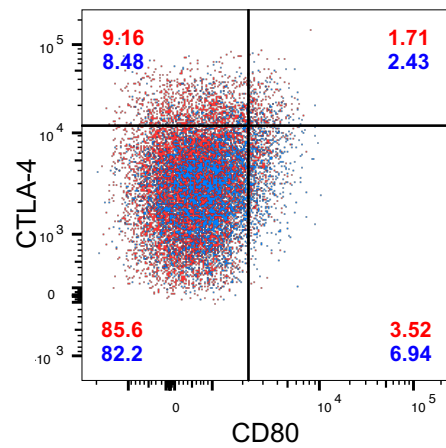

g

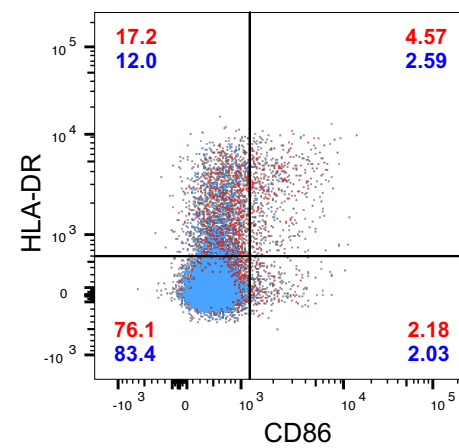

h

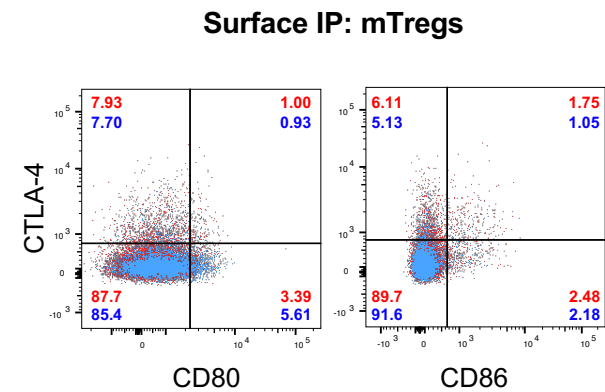

**a**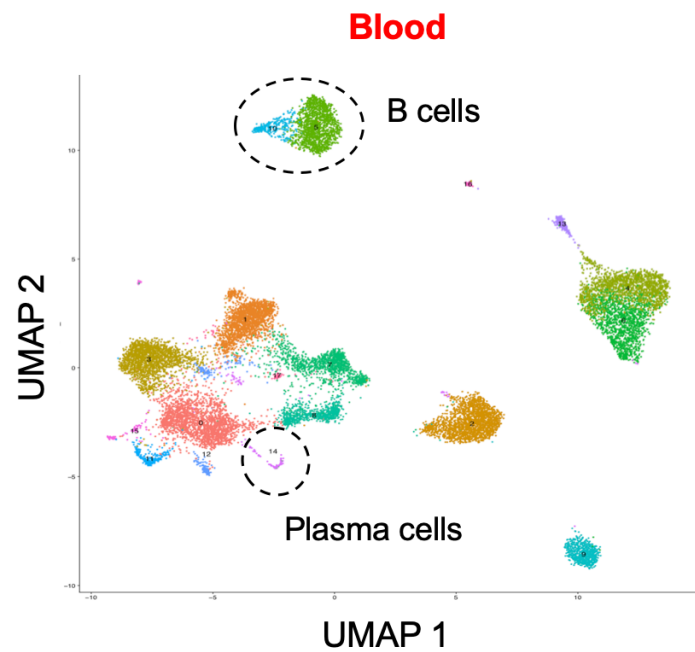**b**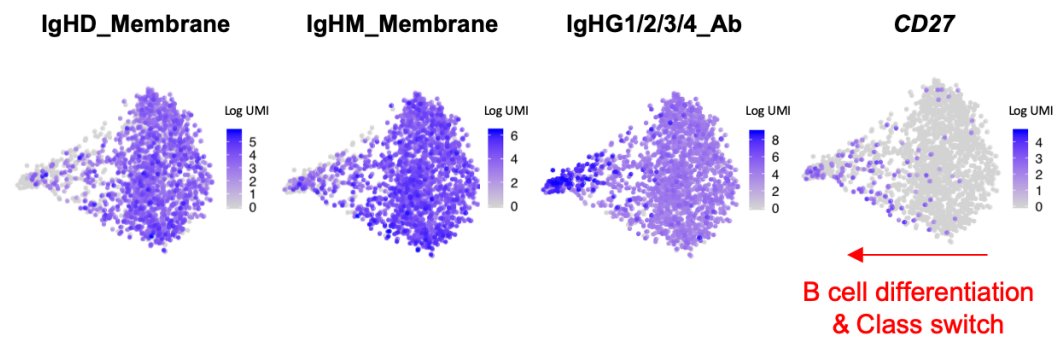**c**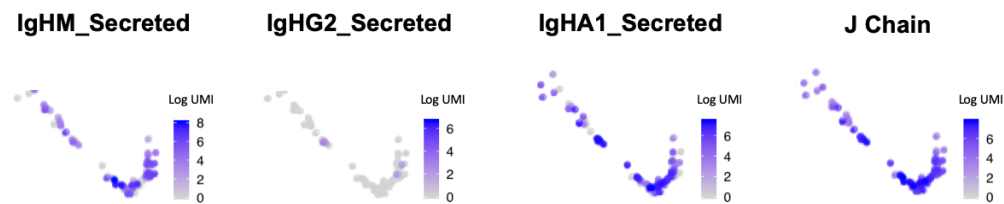**d**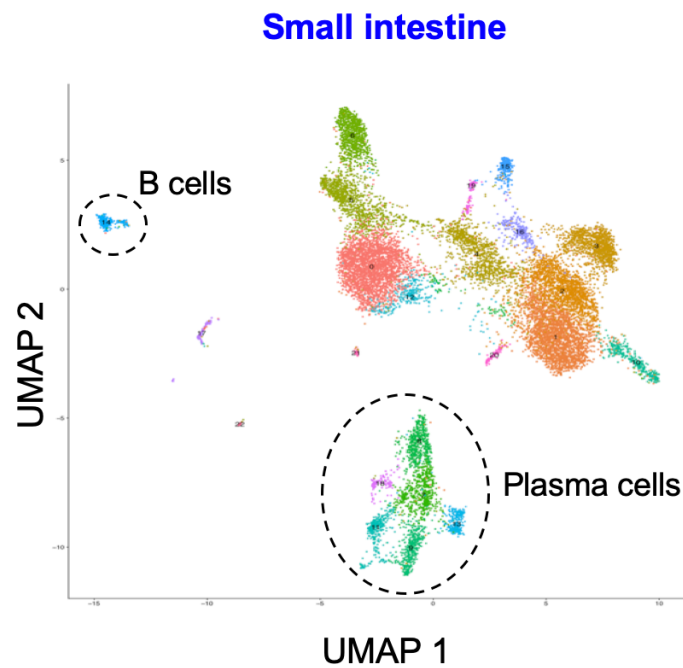**e**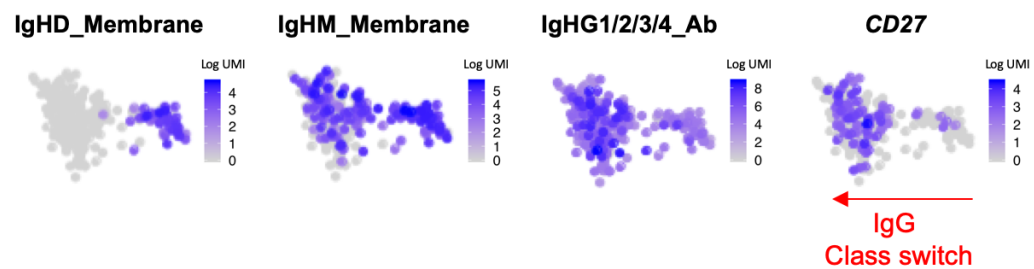**f**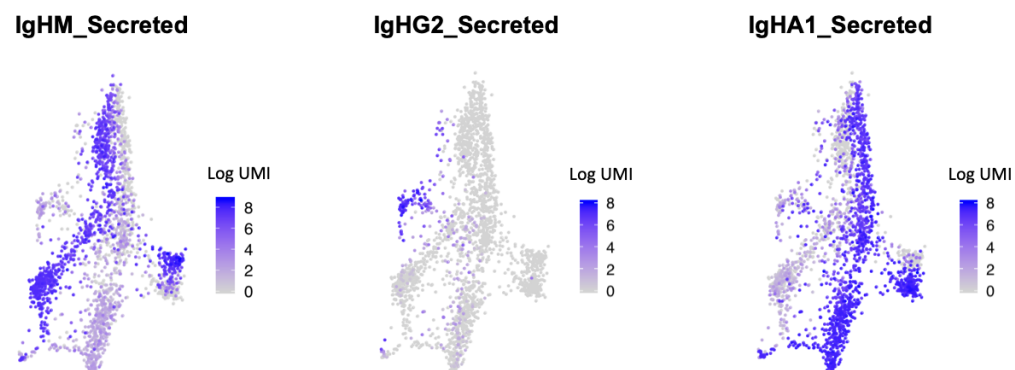



a

**Blood**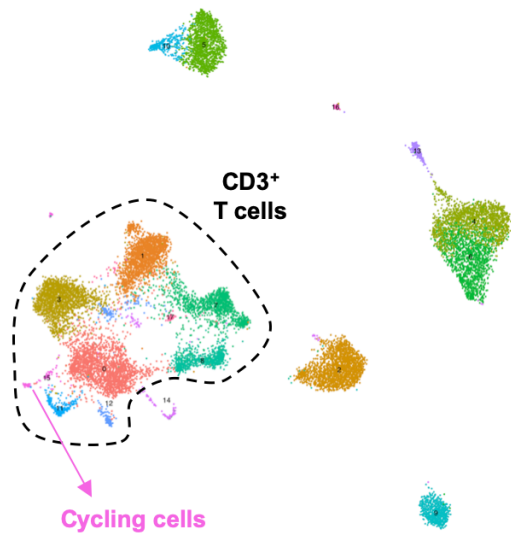

b

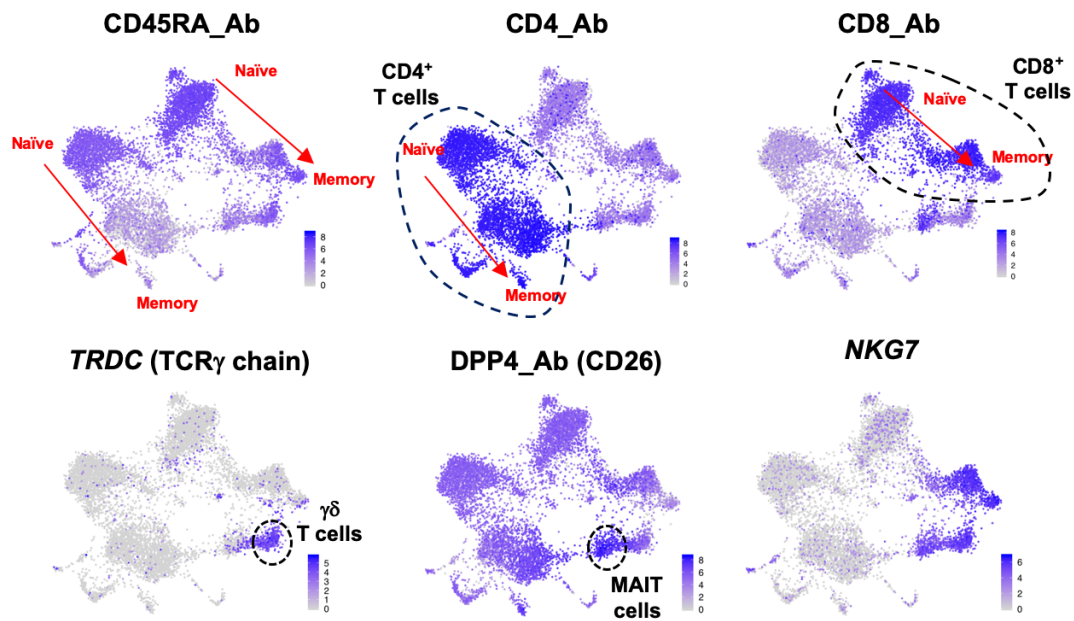

Source: https://biorxiv.org/content/biorxiv/early/2019/07/18/706275.full-text.pdf
